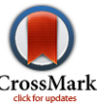

# Nitrosylation Mechanisms of *Mycobacterium tuberculosis* and *Campylobacter jejuni* Truncated Hemoglobins N, O, and P

Paolo Ascenzi<sup>1\*</sup>, Alessandra di Masi<sup>1,2</sup>, Grazia R. Tundo<sup>3,4</sup>, Alessandra Pesce<sup>5</sup>, Paolo Visca<sup>1</sup>, Massimo Coletta<sup>3,4</sup>

**1** Interdepartmental Laboratory of Electron Microscopy, University Roma Tre, Roma, Italy, **2** Department of Sciences, University Roma Tre, Roma, Italy, **3** Department of Clinical Sciences and Translational Medicine, University of Roma "Tor Vergata", Roma, Italy, **4** Interuniversity Consortium for the Research on the Chemistry of Metals in Biological Systems, Bari, Italy, **5** Department of Physics, University of Genova, Genova, Italy

## Abstract

Truncated hemoglobins (trHbs) are widely distributed in bacteria and plants and have been found in some unicellular eukaryotes. Phylogenetic analysis based on protein sequences shows that trHbs branch into three groups, designated N (or I), O (or II), and P (or III). Most trHbs are involved in the O<sub>2</sub>/NO chemistry and/or oxidation/reduction function, permitting the survival of the microorganism in the host. Here, a detailed comparative analysis of kinetics and/or thermodynamics of (i) ferrous *Mycobacterium tuberculosis* trHbs N and O (Mt-trHbN and Mt-trHbO, respectively), and *Campylobacter jejuni* trHb (Cj-trHbP) nitrosylation, (ii) nitrite-mediated nitrosylation of ferrous Mt-trHbN, Mt-trHbO, and Cj-trHbP, and (iii) NO-based reductive nitrosylation of ferric Mt-trHbN, Mt-trHbO, and Cj-trHbP is reported. Ferrous and ferric Mt-trHbN and Cj-trHbP display a very high reactivity towards NO; however, the conversion of nitrite to NO is facilitated primarily by ferrous Mt-trHbN. Values of kinetic and/or thermodynamic parameters reflect specific trHb structural features, such as the ligand diffusion pathways to/from the heme, the heme distal pocket structure and polarity, and the ligand stabilization mechanisms. In particular, the high reactivity of Mt-trHbN and Cj-trHbP reflects the great ligand accessibility to the heme center by two protein matrix tunnels and the E7-path, respectively, and the penta-coordination of the heme-Fe atom. In contrast, the heme-Fe atom of Mt-trHbO the ligand accessibility to the heme center of Mt-trHbO needs large conformational readjustments, thus limiting the heme-based reactivity. These results agree with different roles of Mt-trHbN, Mt-trHbO, and Cj-trHbP *in vivo*.

**Citation:** Ascenzi P, di Masi A, Tundo GR, Pesce A, Visca P, et al. (2014) Nitrosylation Mechanisms of *Mycobacterium tuberculosis* and *Campylobacter jejuni* Truncated Hemoglobins N, O, and P. PLoS ONE 9(7): e102811. doi:10.1371/journal.pone.0102811

**Editor:** Riccardo Manganelli, University of Padova, Medical School, Italy

**Received:** April 28, 2014; **Accepted:** June 23, 2014; **Published:** July 22, 2014

**Copyright:** © 2014 Ascenzi et al. This is an open-access article distributed under the terms of the Creative Commons Attribution License, which permits unrestricted use, distribution, and reproduction in any medium, provided the original author and source are credited.

**Data Availability:** The authors confirm that all data underlying the findings are fully available without restriction. All relevant data are within the paper and its Supporting Information files.

**Funding:** This work was supported by grants from the Ministero dell'Istruzione, dell'Università e della Ricerca of Italy (PRIN 20109MXHMR\_001 and Università Roma Tre, CLAR 2013) to PA. The funders had no role in study design, data collection and analysis, decision to publish, or preparation of the manuscript.

**Competing Interests:** The authors have declared that no competing interests exist.

\* Email: ascenzi@uniroma3.it

## Introduction

Based on phylogeny, the globin superfamily contains three lineages: flavohemoglobins and single domain globins (lineage 1), protoglobins (Pgb) and globin coupled sensors (lineage 2), and truncated hemoglobins (trHbs; lineage 3). Members of the globin superfamily belong to two structural classes: one showing the classical 3-on-3  $\alpha$ -helical sandwich (lineages 1 and 2) and one having the 2-on-2  $\alpha$ -helical sandwich (lineage 3) (Fig. 1). Although no definitive conclusion can be drawn about the ancestral state of the globin fold, the occurrence of the 2-on-2 fold, but not of an isolated 3-on-3 fold, in all three kingdoms of life suggests that the 2-on-2 is the ancestral fold. In an evolutionary perspective, the predominant function of globins is (pseudo-)enzymatic, with O<sub>2</sub> transport and storage being specialized functions associated with the evolution of metazoans [1–6].

TrHbs are widely distributed in bacteria and plants and have been found in some unicellular eukaryotes. They are distantly

related to the 3-on-3 globins, showing less than 20% overall identity with the latter. Phylogenetic analysis of protein sequences shows that trHbs branch into three groups, designated N (or I), O (or II), and P (or III). TrHbs belonging to groups N and O separate into two and four subgroups, respectively; trHbs belonging to group P display a level of conservation higher than those of groups N and O (Fig. 1). The overall sequence identity between trHbs from different groups is  $\leq 20\%$ , but may be higher than 80% within a given group. Some bacteria display multiple trHbs belonging to different groups, suggesting a scenario for the evolution of the different groups where the group O gene is the ancestor, and group N and P genes are the results of duplications and transfer events [1–6].

TrHbs fold as a 2-on-2  $\alpha$ -helical sandwich characterized by a very short or absent A-helix, a brief CE inter-helical region, and most of the F-helix occurring as a loop, with only the B, E, G, and H  $\alpha$ -helices surrounding the heme group. Specific residue deletions and substitutions distributed throughout the trHb

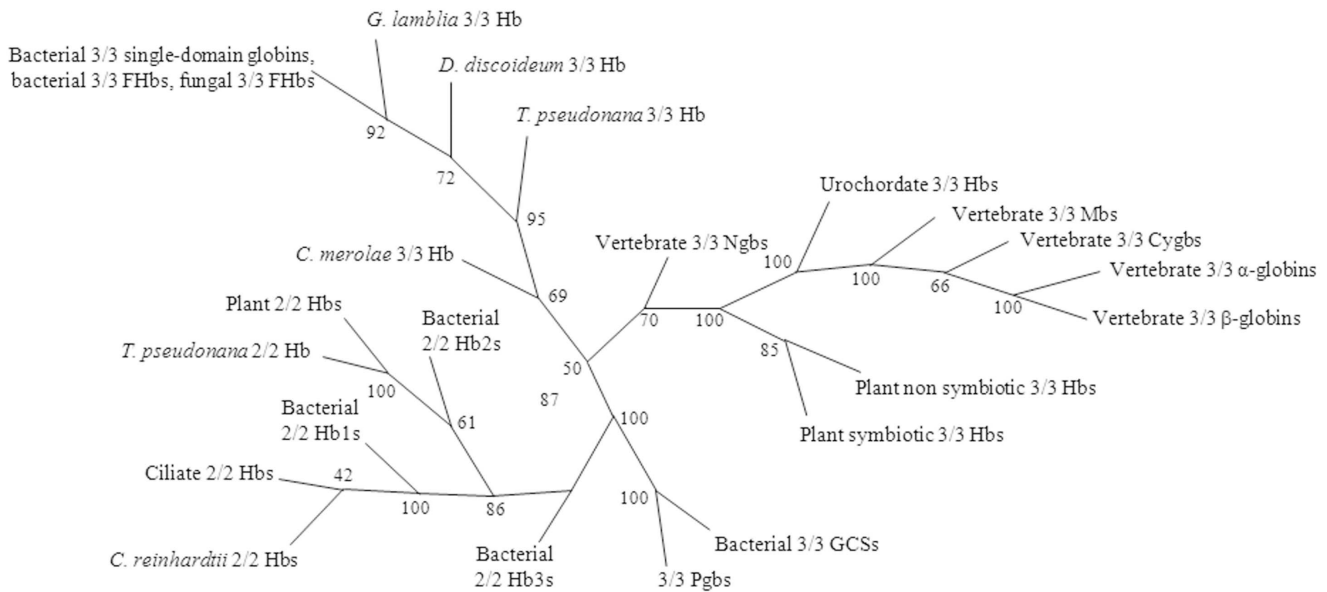

**Figure 1. Consensus phylogenetic tree of major globin groups from the three kingdoms of life.** This phylogenetic tree was based on the alignment of 150 sequences representing the following groups of globins: 10 plant non symbiotic 3/3 Hbs, 5 plant symbiotic 3/3 Hbs, 15 bacterial 3/3 globin-coupled sensors (GCSs), 4 3/3 protoglobins (Pgbs), 9 bacterial 2/2 Hb1s, 19 bacterial 2/2 Hb2s, 10 bacterial 2/2 Hb3s, 2 *Chlamydomonas reinhardtii* 2/2 Hbs, 2 ciliate 2/2 Hbs, 3 plant 2/2 Hbs, *Thalassiosira pseudonana* 2/2 Hb, 20 bacterial 3/3 flavohemoglobins (FHbs), 19 bacterial 3/3 single-domain Hbs, 9 eukaryote 3/3 FHbs, 1 diplomonad *Giardia lamblia* 3/3 Hb, and 1 mycetozoon *Dictyostelium discoideum* 3/3 Hb, *Cyanidioschyzon merolae* and *Thalassiosira pseudonana* 3/3 single-domain globins, and 3 vertebrate (*i.e.*, human, bird, and fish) 3/3 neuroglobins (Ngbs), cytoglobins (Cygbs),  $\alpha$ - and  $\beta$ -globins and myoglobins (Mbs), and 2 urochordate 3/3 Hbs. Modified from [1] (Copyright (2005) National Academy of Sciences, U S A).

doi:10.1371/journal.pone.0102811.g001

sequence allow the achievement of the simplified fold, keeping at the same time a high affinity for the heme, a suitable ligand access to the heme-Fe atom, and the proper heme-Fe oxidation state. However, specific features, such as ligand entry/exit mechanisms holding to promote diffusion of ligands to/from the heme, the heme distal pocket structure and polarity, as well as ligand stabilization mechanisms distinguish members of the three trHb groups (Fig. 2) [5].

*Mycobacterium tuberculosis* (*M. tuberculosis*) possesses two trHbs, namely Mt-trHbN and Mt-trHbO, and a 3-on-3 flavohemoglobin, while *Campylobacter jejuni* (*C. jejuni*) possesses only *Campylobacter jejuni* trHb type P (Cj-trHbP) and a single-domain 3-on-3 globin [4,5,7–11].

Most trHbs are involved in the O<sub>2</sub>/NO chemistry and/or oxidation/reduction function, permitting the survival of the microorganism in the host [5,11–13]. Noteworthy, Mt-trHbN binds reversibly isoniazid, a first-line anti-tuberculosis medication in prevention and treatment of tuberculosis, highlighting a direct role of the pro-drug to impair fundamental functions of mycobacteria, *e.g.* scavenging of reactive nitrogen and oxygen species, and metabolism [14].

Studies performed with *Mycobacterium bovis* Calmette-Guerin (BCG) demonstrated that the inactivation of the *glbN* gene impairs the ability of stationary phase cells to protect aerobic respiration from NO inhibition, suggesting that Mt-trHbN may play a vital role in protecting *M. tuberculosis* from NO toxicity *in vivo* [12,15]. This functional assessment is supported by the observation that Mt-trHbN catalyzes the rapid oxidation of NO into nitrate [13,16]. Heterologous expression of Mt-trHbN has also been shown to protect *Escherichia coli* against nitrosative stress [17]. On the other hand, Mt-trHbO does not detoxify NO efficiently [18], but displays peroxidase activity, suggesting an oxidation/reduction function [19]. Lastly, Cj-trHbP has been

proposed to play a prominent role in *C. jejuni* respiration rather than in protection against reactive nitrogen and oxygen species. A strain of *C. jejuni* lacking trHbP turned out to be disadvantaged with respect to wild-type cells when grown under high aeration, achieving lower growth yields and consuming O<sub>2</sub> at approximately half the rate displayed by wild-type cells. Although Cj-trHbP mutated cells are equally sensitive as the wild-type to NO and oxidative stress, the actual functional role of Cj-trHbP remains elusive [7,8,11].

Here, a detailed comparative analysis of kinetics and/or thermodynamics of (*i*) ferrous Mt-trHbN, Mt-trHbO, and Cj-trHbP (trHbN(II), Mt-trHbO(II), and Cj-trHbP(II), respectively) nitrosylation, (*ii*) nitrite-mediated nitrosylation of Mt-trHbN(II), Mt-trHbO(II), and Cj-trHbP(II), and (*iii*) NO-based reductive nitrosylation of ferric Mt-trHbN, Mt-trHbO, and Cj-trHbP (trHbN(III), Mt-trHbO(III), and Cj-trHbP(III), respectively) is reported. Ferrous and ferric Mt-trHbN and Cj-trHbP display a very high reactivity towards NO, the conversion of nitrite to NO being facilitated primarily by ferrous Mt-trHbN. This reflects the great ligand accessibility to the heme center of Mt-trHbN, and Cj-trHbP by two protein matrix tunnels and the E7-path, respectively, and the penta-coordination of the heme-Fe atom. In contrast, the accessibility to the heme center of Mt-trHbO needs large conformational readjustments, thus limiting the heme-based reactivity. These results agree with different roles of Mt-trHbN, Mt-trHbO, and Cj-trHbP *in vivo*.

## Materials

Mt-TrHbN(III), Mt-trHbO(III), and Cj-trHbP(III) were cloned, expressed and purified as previously reported [20–22]. Mt-TrHbN(II), Mt-trHbO(II), and Cj-trHbP(II) were obtained, under anaerobic conditions, by adding sodium dithionite (final concen-

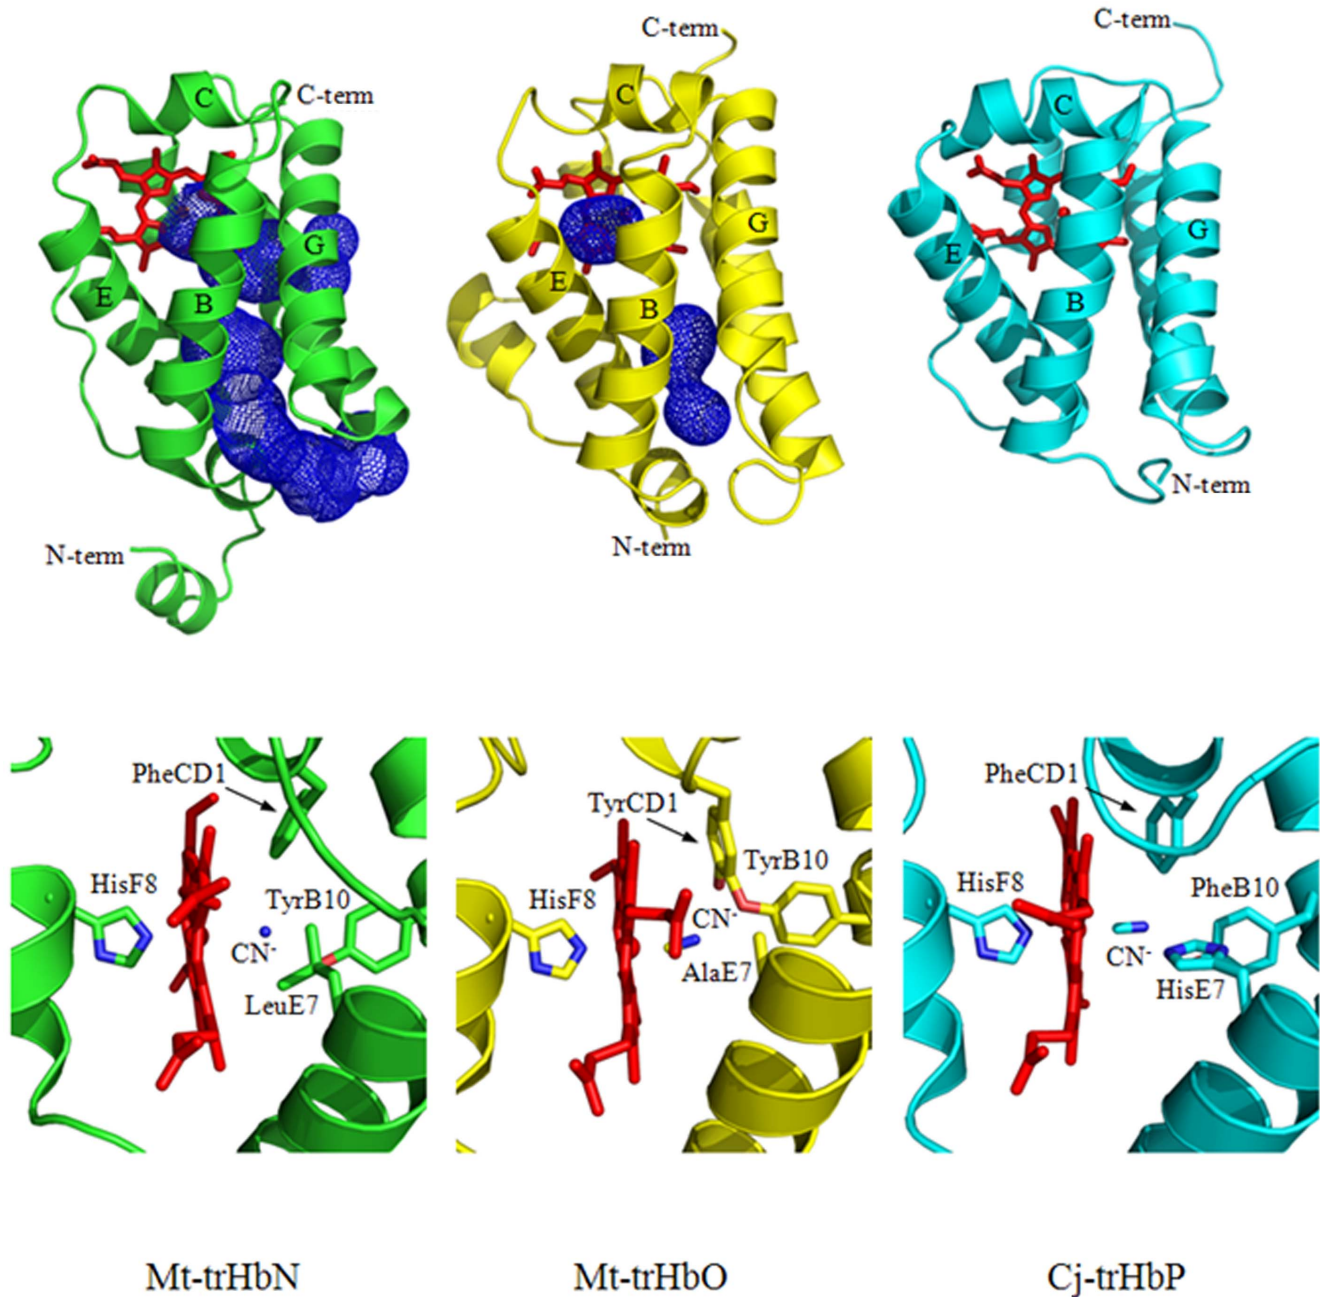

**Figure 2. Three-dimensional structure of Mt-trHbN, Mt-trHbO, and Cj-trHbP.** (Top) Ribbon views of Mt-trHbN, Mt-trHbO, and Cj-trHbP, including the heme-Fe group (red) and the protein matrix cavity/tunnel systems (blue mesh). (Bottom) The heme-Fe pocket of Mt-trHbN, Mt-trHbO, and Cj-trHbP. The heme group is colored in red. The heme ligand (a cyanide ion in all the three structures) and the side chains of residues in the B10, CD1, E7 and F8 topological positions are highlighted. Atomic coordinates were taken from the PDB entries 1556 (Mt-trHbN), 1NGK (Mt-trHbO), and 2IG3 (Cj-trHbP). All pictures have been drawn with the Swiss-PdbViewer [91].  
doi:10.1371/journal.pone.0102811.g002

tration,  $1.0 \times 10^{-3}$  M to  $5.0 \times 10^{-3}$  M). The concentration of Mt-trHbN, Mt-trHbO, and Cj-trHbP stock solutions was  $3.0 \times 10^{-6}$  M,  $4.6 \times 10^{-6}$  M, and  $3.2 \times 10^{-6}$  M, respectively.

Gaseous NO (from Aldrich Chemical Co. (Milwaukee, WI, USA) was purified by flowing through a NaOH column in order to remove acidic nitrogen oxides. The stock NO solution was prepared anaerobically by keeping in a closed vessel the degassed  $5.0 \times 10^{-3}$  M phosphate buffer solution (pH = 7.0) under NO at

$P = 760.0$  mm Hg ( $T = 20.0^\circ\text{C}$ ). The solubility of NO in the aqueous buffered solution is  $2.05 \times 10^{-3}$  M, at  $P = 760.0$  mm Hg and  $T = 20.0^\circ\text{C}$  [23]. Sodium dithionite (final concentration,  $5.0 \times 10^{-4}$  M) was added to NO solutions (final concentration,  $1.0 \times 10^{-4}$  M to  $5.0 \times 10^{-4}$  M).

All the other chemicals were obtained from Merck AG (Darmstadt, Germany). All products were of analytical grade and used without purification unless stated.

## Methods

### Nitrosylation of Mt-trHbN(II), Mt-trHbO(II), and Cj-trHbP(II)

Kinetics of Mt-trHbN(II), Mt-trHbO(II), and Cj-trHbP(II) nitrosylation were analyzed in the framework of the minimum reaction mechanism represented by Scheme A [23]:

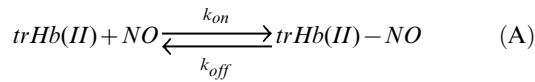

Values of the pseudo-first-order rate constant (*i.e.*,  $k$ ) for Mt-trHbN(II), Mt-trHbO(II), and Cj-trHbP(II) nitrosylation were obtained by mixing the trHb(II) solutions (final concentration,  $1.5 \times 10^{-6}$  M,  $2.3 \times 10^{-6}$  M, and  $1.6 \times 10^{-6}$  M, respectively) with the NO solution (final concentration,  $5.0 \times 10^{-6}$  M to  $1.2 \times 10^{-4}$  M) under anaerobic conditions.

No gaseous phase was present. The nitrosylation of Mt-trHbN(II), Mt-trHbO(II), and Cj-trHbP(II) was monitored between 360 and 460 nm.

In view of the linear relationship between the absorbance change and the protein concentration change, values of the pseudo-first-order rate constant  $k$  were obtained according to Eqn. (1) [23]:

$$[trHB(II)]_t = [trHB(II)]_i \times e^{-k \times t} \quad (1)$$

Values of the second-order rate constant for Mt-trHbN(II), Mt-trHbO(II), and Cj-trHbP(II) nitrosylation (*i.e.*,  $k_{on}$ ) were obtained from the dependence of  $k$  on the NO concentration (*i.e.*,  $[NO]$ ), according to Eqn. (2) [23]:

$$k = k_{on} \times [NO] + k_{off} \quad (2)$$

where  $k_{off}$  is the first-order rate constant for trHb(II)-NO denitrosylation.

Values of  $k_{on}$  and  $k_{off}$  for Mt-trHbN(II)(-NO), Mt-trHbO(II)(-NO), and Cj-trHbP(II)(-NO) (de)nitrosylation were obtained at pH 7.0 and 9.0 ( $1.0 \times 10^{-1}$  M Bis-Tris propane buffer), and 20.0°C.

### Nitrite-mediated nitrosylation of Mt-trHbN(II), Mt-trHbO(II), and Cj-trHbP(II)

Kinetics of the nitrite-mediated nitrosylation of Mt-trHbN(II), Mt-trHbO(II), and Cj-trHbP(II) were analyzed in the framework of the minimum reaction mechanism depicted in Scheme B [24–35]:

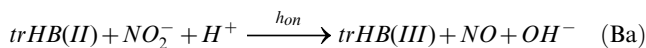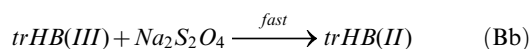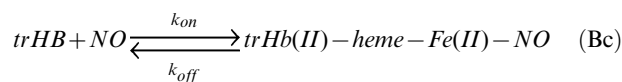

Values of the pseudo-first-order rate constant (*i.e.*,  $h$ ; reaction (a) in Scheme B) for the nitrite-mediated nitrosylation of Mt-trHbN(II), Mt-trHbO(II), and Cj-trHbP(II) were determined spectrophotometrically by mixing the trHb(II) solutions (final concentration,  $1.5 \times 10^{-6}$  M,  $2.3 \times 10^{-6}$  M, and  $1.6 \times 10^{-6}$  M, respectively) with the nitrite solutions (final concentration,  $1.0 \times 10^{-3}$  M to  $1.0 \times 10^{-2}$  M) in the presence of sodium dithionite (final concentration,  $2.0 \times 10^{-3}$  M), under anaerobic conditions. Remarkably, sodium dithionite concentration lower than  $1.0 \times 10^{-2}$  M does not effectively reduce nitrite to NO [28]. No gaseous phase was present. The nitrite-mediated nitrosylation of Mt-trHbN(II), Mt-trHbO(II), and Cj-trHbP(II) was monitored between 360 and 460 nm.

In view of the linear relationship between the absorbance change and the protein concentration change, values of the pseudo-first-order rate constant for the nitrite-mediated nitrosylation of Mt-trHbN(II), Mt-trHbO(II), and Cj-trHbP(II) (*i.e.*,  $h$ ) were obtained according to Eqn. (3) [24,31,32,34,35]:

$$[trHb(II)]_t = [trHb(II)]_i \times e^{-h \times t} \quad (3)$$

Values of the second order rate constant for the nitrite-mediated nitrosylation of Mt-trHbN(II), Mt-trHbO(II), and Cj-trHbP(II) (*i.e.*,  $h_{on}$ ) were obtained from the dependence of  $h$  on the nitrite concentration (*i.e.*,  $[NO_2^-]$ ), according to Eqn. (4) [24,31,32,34,35]:

$$h = h_{on} \times [NO_2^-] \quad (4)$$

Values of  $h_{on}$  for the nitrite-mediated nitrosylation of Mt-trHbN(II), Mt-trHbO(II), and Cj-trHbP(II) (reaction (a) in Scheme B) were obtained between pH 6.4 and 7.8 ( $1.0 \times 10^{-1}$  M Bis-Tris propane buffer), at 20.0°C.

### Reductive nitrosylation of Mt-trHbN(III), Mt-trHbO(III), and Cj-trHbP(III)

Kinetics and thermodynamics of the reductive nitrosylation of Mt-trHbN(III), Mt-trHbO(III), and Cj-trHbP(III) were analyzed in the framework of the minimum reaction mechanism represented by Scheme C [36–43]:

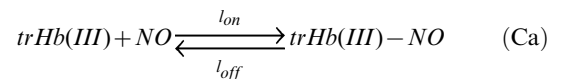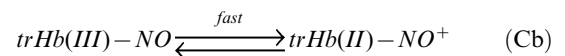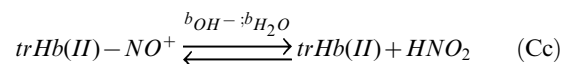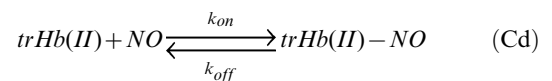

Values of the pseudo-first-order rate constants (*i.e.*,  $l$  and  $b$ ; reactions (a) and (c) in Scheme C, respectively) and of the

dissociation equilibrium constant (*i.e.*,  $L (= l_{\text{off}}/l_{\text{on}})$ ); reaction (a) in Scheme C) for Mt-trHbN(III), Mt-trHbO(III), and Cj-trHbP(III) reductive nitrosylation were obtained by mixing the trHb(III) solutions (final concentration,  $1.5 \times 10^{-6}$  M,  $2.3 \times 10^{-6}$  M, and  $1.6 \times 10^{-6}$  M, respectively) with the NO solution (final concentration,  $2.5 \times 10^{-5}$  M to  $5.0 \times 10^{-4}$  M) under anaerobic conditions. No gaseous phase was present. The reductive nitrosylation of Mt-trHbN(III), Mt-trHbO(III), and Cj-trHbP(III) was monitored between 360 and 460 nm.

In view of the linear relationship between the absorbance change and the protein concentration change, values of the pseudo-first-order rate constants  $l$  and  $b$  were obtained according to Eqns (5a)–(5c) [36–44]:

$$[trHb(III)]_t = [trHb(III)]_i \times e^{-l \times t} \quad (5a)$$

$$[trHb(III) - NO]_t = [trHb(III)]_i \times l \times \left( \frac{e^{-l \times t}}{b - l} + \frac{e^{-b \times t}}{l - b} \right) \quad (5b)$$

$$\begin{aligned} & [trHb(II) - NO]_t \\ & = [trHb(III)]_i - [trHb(III)]_t + [trHb(III) - NO]_t \end{aligned} \quad (5c)$$

Values of  $l_{\text{on}}$  and  $l_{\text{off}}$  (reaction (a) in Scheme C) were determined from the dependence of  $l$  on  $[NO]$ , according to Eqn. (6) [23]:

$$l = l_{\text{on}} \times [NO] + l_{\text{off}} \quad (6)$$

Values of  $L$  (reaction (a) in Scheme C) were obtained according to Eqn. (7) [23,41,42]:

$$\alpha = \frac{[NO]}{L + [NO]} \quad (7)$$

where  $\alpha$  is the molar fraction of the NO-bound Mt-trHbN(III), Mt-trHbO(III), and Cj-trHbP(III). Moreover, values of  $L$  were estimated from the  $l_{\text{off}}/l_{\text{on}}$  ratio [23].

Values of the second-order rate constant  $b_{\text{OH}^-}$  and of the first-order rate constant  $b_{\text{H}_2\text{O}}$  for the  $\text{OH}^-$ - and  $\text{H}_2\text{O}$ -catalyzed conversion of trHb(II)-NO<sup>+</sup> to trHb(II), respectively (reaction (c) in Scheme C), were determined from the dependence of  $b$  on  $[\text{OH}^-]$  according to Eqn. (8) [36–43]:

$$b = b_{\text{OH}^-} \times [\text{OH}^-] + b_{\text{H}_2\text{O}} \quad (8)$$

Values of  $L$ ,  $l_{\text{on}}$ ,  $l_{\text{off}}$ ,  $b_{\text{OH}^-}$ , and  $b_{\text{H}_2\text{O}}$  for the reductive nitrosylation of Mt-trHbN(III), Mt-trHbO(III), and Cj-trHbP(III) (reactions (3a) and (3c) in Scheme C) were obtained between pH 8.4 and pH 9.4 ( $1.0 \times 10^{-1}$  M Bis-Tris propane buffer), at 20.0°C. Values of  $k_{\text{on}}$  and  $k_{\text{off}}$  for Mt-trHbN(II), Mt-trHbO(II), and Cj-trHbP(II) nitrosylation (Scheme A, and reaction (Cd) in Scheme C) were obtained at pH 9.0 and 20.0°C; see above).

The reductive nitrosylation of Mt-trHbN(III), Mt-trHbO(III), and Cj-trHbP(III) was also obtained anaerobically by keeping the trHb(III) solutions under purified gaseous NO (760 mmHg), between pH 8.4 and 9.4 ( $1.0 \times 10^{-1}$  M Bis-Tris propane buffer) and 20.0°C.

## Stopped-flow apparatus

Kinetic experiments have been carried out spectrophotometrically with the BioLogic SFM 2000 (Claix, France) rapid-mixing stopped-flow apparatus at single wavelength between 360 nm and 460 nm; the dead-time of the stopped-flow apparatus was  $\sim 1$  ms and the observation chamber was 1 cm.

## Data analysis

Kinetic data obtained at different wavelengths have been normalized each other on the basis of the total absorbance change at the specific wavelength. The results are given as mean values of at least four experiments plus or minus the corresponding standard deviation. All data were analyzed using the MATLAB program (The Math Works Inc., Natick, MA, USA).

## Results and Discussion

### Nitrosylation of Mt-trHbN(II), Mt-trHbO(II), and Cj-trHbP(II)

Mixing Mt-trHbN(II), Mt-trHbO(II), and Cj-trHbP(II) with NO solutions (pH 7.0 and 9.0, 20.0°C) induces a pH-independent shift of the optical absorption maximum of the Soret band from 430–433 nm (*i.e.*, trHb(II)) to 416–418 nm (*i.e.*, trHb(II)-NO) (Fig. 3, and Figs S1 and S2 in File S1, panel A, and Table 1). pH-independent absorbance spectra of Mt-trHbN(II)-NO, Mt-trHbO(II)-NO, and Cj-trHbP(II)-NO obtained mixing Mt-trHbN(II), Mt-trHbO(II), and Cj-trHbP(II) with NO solutions correspond to those obtained by adding gaseous NO to the Mt-trHbN(II), Mt-trHbO(II), and Cj-trHbP(II) solutions. Moreover, values of  $\lambda_{\text{max}}$  and  $\epsilon$  of the absorption spectra in the Soret region of Mt-trHbN(II), Mt-trHbO(II), and Cj-trHbP(II) agree with those reported in the literature [8,20,21,45,46].

Under all experimental conditions, the time course of NO binding to Mt-trHbN(II), Mt-trHbO(II), and Cj-trHbP(II) corresponds to a mono-molecular process for more than 80% of its course (Fig. 3, and Figs S1 and S2 in File S1, panels B and C). Values of the pseudo-first-order rate constant for Mt-trHbN(II), Mt-trHbO(II), and Cj-trHbP(II) nitrosylation (*i.e.*,  $k$ ; Eqn. (1)) are wavelength-independent at fixed NO concentration (data not shown).

Values of  $k$  increase linearly with the NO concentration (Fig. 3, and Figs S1 and S2 in File S1, panels D and E). The analysis of data reported in Figure 3, and Figures S1 and S2 in File S1 (panels D and E), according to Eqn. (2), allowed the determination of values of the second-order rate constant for Mt-trHbN(II), Mt-trHbO(II), and Cj-trHbP(II) nitrosylation (*i.e.*,  $k_{\text{on}}$ ; corresponding to the slope of the linear plots), which are essentially pH-independent (Fig. 3, and Figs S1 and S2 in File S1, panels D and E). The y intercept of the linear plots appears very close to zero (Fig. 3, and Figs S1 and S2 in File S1, panels D and E), indicating that values of  $k_{\text{off}}$  for Mt-trHbN(II)-NO, Mt-trHbO(II)-NO, and Cj-trHbP(II)-NO denitrosylation are lower by at least two-orders of magnitude than values of  $k$  obtained at the lowest NO concentration (*i.e.*,  $k_{\text{off}} < 1 \times 10^{-1} \text{ s}^{-1}$ ).

Values of  $k_{\text{on}}$  for NO binding to Mt-trHbN(II) and Cj-trHbP(II) vary between  $1.1 \times 10^7 \text{ M}^{-1} \text{ s}^{-1}$  and  $2.1 \times 10^7 \text{ M}^{-1} \text{ s}^{-1}$  at pH 7.0 and pH 9.0 (Fig. 3, and Figs S1 and S2 in File S1, panels D and E, and Table 2). Values of  $k_{\text{on}}$  for NO binding to Mt-trHbO(II) here determined at pH 7.0 and 9.0 ( $= 1.9 \times 10^5 \text{ M}^{-1} \text{ s}^{-1}$  and  $2.3 \times 10^5 \text{ M}^{-1} \text{ s}^{-1}$ , respectively; Fig. S1 in File S1, panels D and E, and Table 2) are in agreement with data referring of the slow nitrosylation course, reflecting 80% of the whole process, previously reported at pH 7.5 ( $= 1.8 \times 10^5 \text{ M}^{-1} \text{ s}^{-1}$ ) [18]. Values of  $k_{\text{on}}$  for NO binding to Mt-trHbO(II) and Cj-trHbP(II) increase

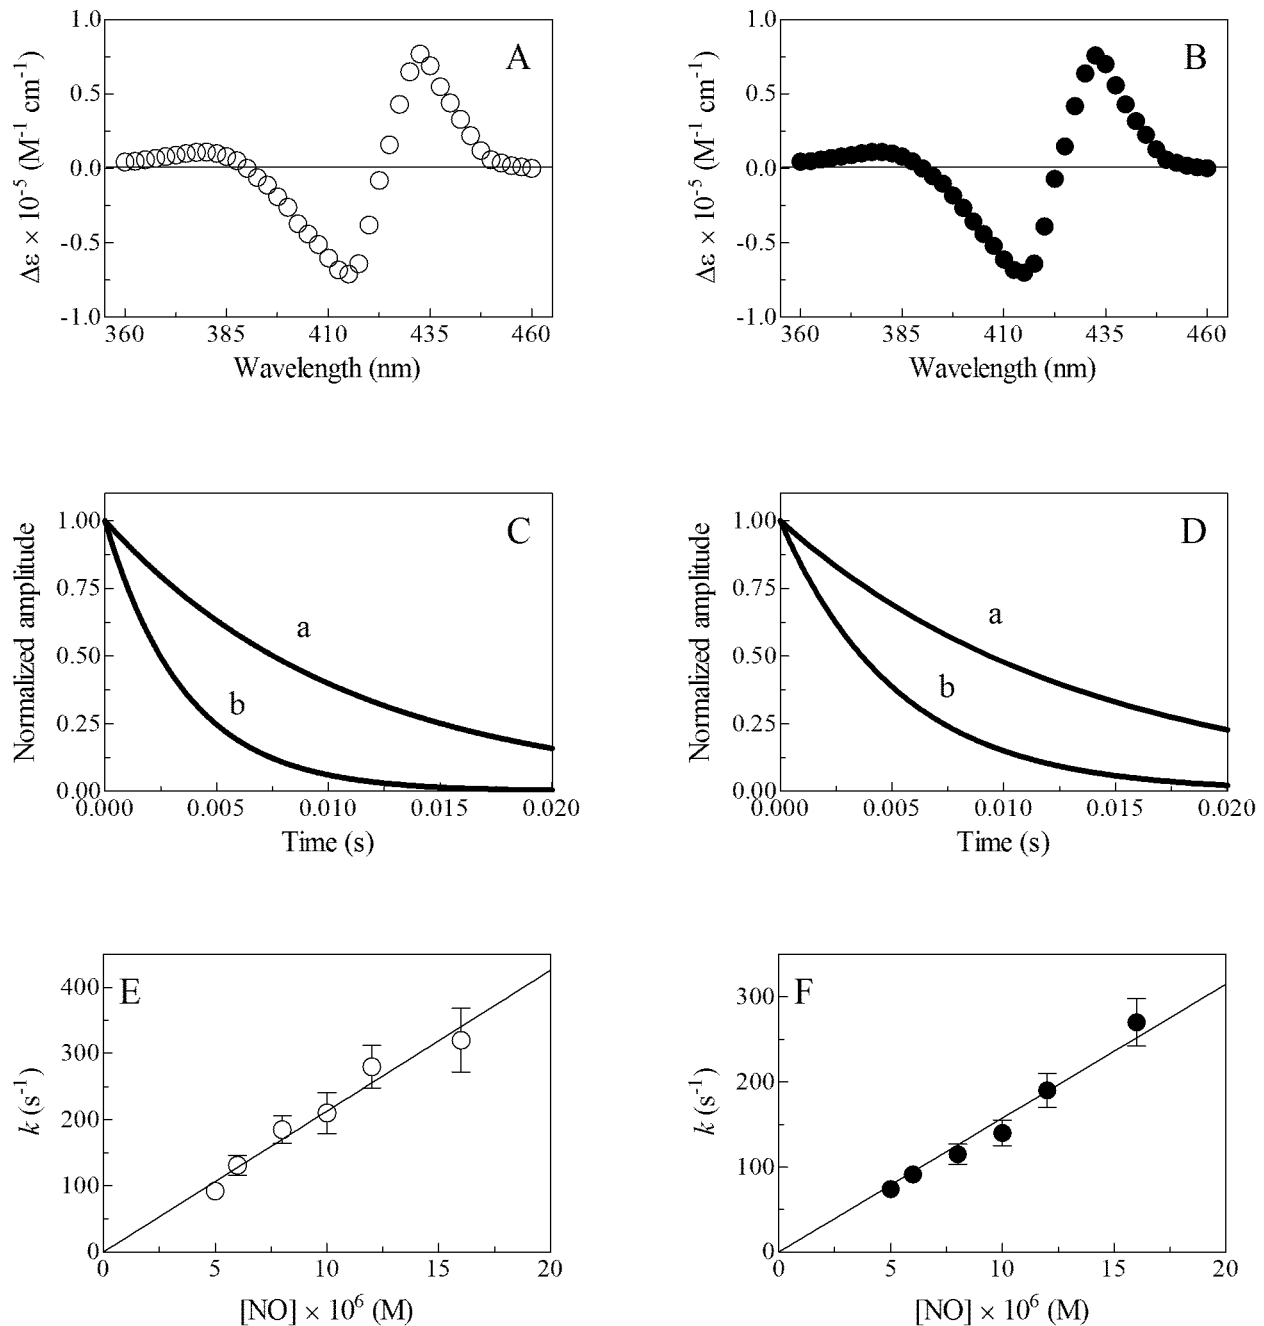

**Figure 3. Mt-trHbN(II) nitrosylation at 20.0°C.** (A) Difference absorbance spectrum of Mt-trHbN(II) minus Mt-trHbN(II)-NO, at pH 7.0. (B) Difference absorbance spectrum of Mt-trHbN(II) minus Mt-trHbN(II)-NO, at pH 9.0. (C) Normalized averaged time courses of Mt-trHbN(II) nitrosylation, at pH 7.0. The NO concentration was  $5.0 \times 10^{-6} \text{ M}$  (trace a) and  $1.2 \times 10^{-5} \text{ M}$  (trace b). The time course analysis according to Eqn. (1) allowed the determination of the following values of  $k = 9.2 \times 10^1 \text{ s}^{-1}$  (trace a) and  $2.8 \times 10^2 \text{ s}^{-1}$  (trace b). (D) Normalized averaged time courses of Mt-trHbN(II) nitrosylation, at pH 9.0. The NO concentration was  $5.0 \times 10^{-6} \text{ M}$  (trace a) and  $1.2 \times 10^{-5} \text{ M}$  (trace b). The time course analysis according to Eqn. (1) allowed the determination of the following values of  $k = 7.4 \times 10^1 \text{ s}^{-1}$  (trace a) and  $1.9 \times 10^2 \text{ s}^{-1}$  (trace b). (E) Dependence of the pseudo-first-order rate-constant  $k$  for Mt-trHbN(II) nitrosylation on the NO concentration, at pH 7.0. The analysis of data according to Eqn. (2) allowed the determination of  $k_{\text{on}} = (2.1 \pm 0.3) \times 10^7 \text{ M}^{-1} \text{ s}^{-1}$ . (F) Dependence of the pseudo-first-order rate-constant  $k$  for Mt-trHbN(II) nitrosylation on the NO concentration, at pH 9.0. The analysis of data according to Eqn. (2) allowed the determination of  $k_{\text{on}} = (1.6 \pm 0.3) \times 10^7 \text{ M}^{-1} \text{ s}^{-1}$ . The Mt-trHbN(II) concentration was  $1.5 \times 10^{-6} \text{ M}$ . The NO concentration was  $1.0 \times 10^{-4} \text{ M}$  (panels A and B). Where not shown, the standard deviation is smaller than the symbol. For details, see text.

doi:10.1371/journal.pone.0102811.g003

changing the pH from 7.0 to 9.0, whereas values of  $k_{\text{on}}$  for Mt-trHbN(II) nitrosylation decrease. However, the small magnitude of the pH-dependent change, essentially within the error limit, might suggest that these variations are not statistically relevant.

Values of  $k_{\text{on}}$  for nitrosylation of ferrous heme-proteins span over eight orders of magnitude (Table 2) ([36,41–43,47–53] and present study), mainly reflecting the ligand accessibility to the heme distal pocket and the coordination of the heme-Fe(II) atom.

**Table 1.** Values of  $\lambda_{\max}$  and  $\epsilon$  of the absorption spectra in the Soret region of ferric and ferrous derivatives of Mt-trHbN, Mt-trHbO, and Cj-trHbP, 20.0°C.

| Derivative                    | $\lambda_{\max}$ (nm) | $\epsilon$ ( $M^{-1} \text{ cm}^{-1}$ ) | pH         |
|-------------------------------|-----------------------|-----------------------------------------|------------|
| Mt-trHbN(III)                 | 406                   | $1.41 \times 10^5$                      | 6.4        |
| Mt-trHbN(III)-OH <sup>-</sup> | 410                   | $1.25 \times 10^5$                      | 9.4        |
| Mt-trHbN(III)-NO              | 421                   | $1.37 \times 10^5$                      | 6.4 to 9.4 |
| Mt-trHbN(II)                  | 432                   | $1.03 \times 10^5$                      | 6.4 to 9.4 |
| Mt-trHbN(II)-NO               | 417                   | $1.22 \times 10^5$                      | 6.4 to 9.4 |
| Mt-trHbO(III)                 | 409                   | $1.04 \times 10^5$                      | 6.4        |
| Mt-trHbO(III)-OH <sup>-</sup> | 412                   | $1.36 \times 10^5$                      | 9.4        |
| Mt-trHbO(III)-NO              | 422                   | $1.46 \times 10^5$                      | 6.4 to 9.4 |
| Mt-trHbO(II)                  | 430                   | $9.20 \times 10^4$                      | 6.4 to 9.4 |
| Mt-trHbO(II)-NO               | 416                   | $1.28 \times 10^5$                      | 6.4 to 9.4 |
| Cj-trHbP(III)                 | 410                   | $1.41 \times 10^5$                      | 6.4        |
| Cj-trHbP(III)-OH <sup>-</sup> | 414                   | $1.09 \times 10^5$                      | 9.4        |
| Cj-trHbP(III)-NO              | 420                   | $1.28 \times 10^5$                      | 6.4 to 9.4 |
| Cj-trHbP(II)                  | 433                   | $1.19 \times 10^5$                      | 6.4 to 9.4 |
| Cj-trHbP(II)-NO               | 418                   | $1.41 \times 10^5$                      | 6.4 to 9.4 |

doi:10.1371/journal.pone.0102811.t001

Of note, H-bond interactions locking the heme distal residues TyrCD1 and TrpG8 of Mt-trHbO limits ligand access to the heme distal pocket (Fig. 2) [18]. In contrast, the low values of  $k_{\text{on}}$  for ferrous horse heart cytochrome *c* and rabbit hemopexin-heme-Fe (HPX-heme-Fe) nitrosylation reflect the slow rate of hexa- to penta-coordination transition of the heme-Fe(II) atom, which precedes ligand binding ([36,52] and present study). On the other hand, the fast hexa- to penta-coordination conversion of the heme-Fe(II) atom of *Arabidopsis thaliana* hemoglobin (Hb) class 1 and *Glycine max* Lb does not affect NO binding [31,34]. Accordingly, the decrease of the  $k_{\text{on}}$  value for the nitrosylation of ferrous human serum heme-Fe-albumin (HSA-heme-Fe) upon binding of warfarin and ibuprofen to the fatty acid binding site 2 (FA2) has been attributed to the allosteric drug-dependent hexa-coordination of the heme-Fe(II) atom [54–56].

#### Nitrite-mediated conversion of Mt-trHbN(II), Mt-trHbO(II), and Cj-trHbP(II) to Mt-trHbN(II)-NO, Mt-trHbO(II)-NO, and Cj-trHbP(II)-NO

Mixing Mt-trHbN(II), Mt-trHbO(II), and Cj-trHbP(II) with nitrite solutions (between pH 6.4 and 7.8, 20.0°C) induces a pH-independent shift of the optical absorption maximum of the Soret band from 430–433 nm (*i.e.*, trHb(II)) to 416–418 nm (*i.e.*, trHb(II)-NO) (Fig. 4, and Figs S3 and S4 in File S1, panel A, and Table 1). pH-independent absorbance spectra of Mt-trHbN(II)-NO, Mt-trHbO(II)-NO, and Cj-trHbP(II)-NO obtained mixing Mt-trHbN(II), Mt-trHbO(II), and Cj-trHbP(II) with nitrite solutions correspond to those obtained by adding either NO solutions or gaseous NO to the Mt-trHbN(II), Mt-trHbO(II), and Cj-trHbP(II) solutions. Moreover, values of  $\lambda_{\max}$  and  $\epsilon$  of the absorption spectra in the Soret region of Mt-trHbN(II), Mt-trHbO(II), and Cj-trHbP(II) derivatives agree with those reported in the literature [8,20,21,45,46].

Under all experimental conditions, the time course of the nitrite-mediated conversion of Mt-trHbN(II), Mt-trHbO(II), and Cj-trHbP(II) to Mt-trHbN(II)-NO, Mt-trHbO(II)-NO, and Cj-trHbP(II)-NO, respectively, corresponds to a mono-molecular

process for more than 90% of its course (Fig. 4, and Figs S3 and S4 in File S1, panel B). Values of the pseudo-first-order rate constant for the nitrite-mediated conversion of Mt-trHbN(II), Mt-trHbO(II), and Cj-trHbP(II) to Mt-trHbN(II)-NO, Mt-trHbO(II)-NO, and Cj-trHbP(II)-NO, respectively, (*i.e.*,  $h$ ; Eqn. (3)) are wavelength-independent at fixed nitrite concentration (data not shown). In agreement with the literature [28], values of  $h$  are independent of the dithionite concentration ranging between  $1.0 \times 10^{-3}$  M and  $5.0 \times 10^{-3}$  M (data not shown).

Values of  $h$  increase linearly with the nitrite concentration (Fig. 4, and Figs S3 and S4 in File S1, panel C). The analysis of data reported in Figure 4, and Figure S3 and S4 in File S1 (panel C) according to Eqn. (4) allowed the determination of values of the second-order rate constant for the nitrite-mediated conversion of Mt-trHbN(II), Mt-trHbO(II), and Cj-trHbP(II) to Mt-trHbN(II)-NO, Mt-trHbO(II)-NO, and Cj-trHbP(II)-NO, respectively, (*i.e.*,  $h_{\text{on}}$ ; corresponding to the slope of the linear plots). The y intercept of the linear plots corresponds to zero, indicating that the nitrite-mediated conversion of Mt-trHbN(II), Mt-trHbO(II), and Cj-trHbP(II) to Mt-trHbN(II)-NO, Mt-trHbO(II)-NO, and Cj-trHbP(II)-NO, respectively, can be considered as an irreversible process.

Values of the rate constants for the nitrite-mediated conversion of Mt-trHbN(II), Mt-trHbO(II), and Cj-trHbP(II) to Mt-trHbN(II)-NO, Mt-trHbO(II)-NO, and Cj-trHbP(II)-NO, respectively, are lower by several orders of magnitude than those of trHb(II) nitrosylation (Tables 1 and 2). This indicates that the formation of the transient Mt-trHbN(III), Mt-trHbO(III), and Cj-trHbP(III) species (Scheme B), which are quickly converted to Mt-trHbN(II), Mt-trHbO(II), and Cj-trHbP(II), respectively, by reaction with sodium dithionite, represents the rate-limiting step of the nitrite-mediated conversion of trHb(II) to trHb(II)-NO.

As reported for most heme-proteins [24–32,34,35], the nitrite-mediated conversion of Mt-trHbN(III), Mt-trHbO(III), and Cj-trHbP(III) to Mt-trHbN(II)-NO, Mt-trHbO(II)-NO, and Cj-trHbP(II)-NO, respectively, requires one proton for the NO and OH<sup>-</sup> formation (Scheme B). Indeed, on increasing the proton concentration by one pH unit, the rate of the nitrite-mediated

**Table 2.** Values of the second-order rate constant for nitrosylation of ferrous globins.

| Heme-protein                                        | $k_{on}$ ( $M^{-1} s^{-1}$ ) |
|-----------------------------------------------------|------------------------------|
| Mt-trHbN                                            | $2.1 \times 10^{7a}$         |
|                                                     | $1.6 \times 10^{7b}$         |
| Mt-trHbO                                            | $1.9 \times 10^{5a}$         |
|                                                     | $2.3 \times 10^{5b}$         |
| Cj-trHbP                                            | $1.1 \times 10^{7a}$         |
|                                                     | $1.7 \times 10^{7b}$         |
| Ma-Pgb <sup>c</sup>                                 | $2.7 \times 10^7$            |
| <i>Arabidopsis thaliana</i> Hb class 1 <sup>d</sup> | $2.5 \times 10^8$            |
| <i>Glycine max</i> Lb <sup>e</sup>                  | $1.2 \times 10^8$            |
| <i>Scapharca inaequivalvis</i> Hb <sup>f</sup>      | $1.6 \times 10^7$            |
| Horse heart Mb <sup>g</sup>                         | $1.6 \times 10^7$            |
| Sperm whale Mb <sup>h</sup>                         | $1.7 \times 10^7$            |
| Mouse Ngb <sup>i</sup>                              | $1.5 \times 10^8$            |
| Tetrameric human Hb <sup>j</sup>                    |                              |
| $\alpha$ -chains                                    | $2.6 \times 10^7$            |
| $\beta$ -chains                                     | $2.6 \times 10^7$            |
| Horse heart cytochrome <i>c</i> <sup>k</sup>        | 8.3                          |
| HSA-heme-Fe <sup>l</sup>                            | $6.3 \times 10^6$            |
| Ibuprofen-HSA-heme-Fe(II) <sup>l</sup>              | $4.1 \times 10^5$            |
| Warfarin-HSA-heme-Fe(II) <sup>l</sup>               | $4.8 \times 10^5$            |
| Rabbit HPX-heme-Fe <sup>m</sup>                     | $6.3 \times 10^3$            |

<sup>a</sup>pH 7.0 and 20.0°C. Present study.

<sup>b</sup>pH 9.0 and 20.0°C. Present study.

<sup>c</sup>pH 7.2 and 22.0°C. From [43].

<sup>d</sup>pH 7.0 and 20.0°C. From [53].

<sup>e</sup>pH 7.0 and 20.0°C. From [49].

<sup>f</sup>pH 7.0 and 20.0°C. From [50].

<sup>g</sup>pH 9.2 and 20.0°C. From [41].

<sup>h</sup>pH 7.0 and 20.0°C. From [48].

<sup>i</sup>pH 7.5 and room temperature. From [51].

<sup>j</sup>pH 7.0 and 20.0°C. From [47].

<sup>k</sup>pH 6.5 and room temperature. From [36].

<sup>l</sup>pH 7.0 and 20.0°C. From [55].

<sup>m</sup>pH 7.0 and 10.0°C. From [52].

doi:10.1371/journal.pone.0102811.t002

conversion of trHbN(II) to trHbP(II)-NO (*i.e.*, Log  $h_{on}$ ) increases by one-order of magnitude (Fig. 4, and Figs S3 and S4 in File S1, panel D). However, the increase of  $h_{on}$  for the nitrite-mediated conversion of human cytoglobin on pH decrease has been interpreted accounting for the reversible pH-dependent penta-to-hexa-coordination transition of the heme-Fe(II) atom [33].

Values of  $h_{on}$  for nitrite-mediated conversion of ferrous heme-proteins to their ferrous nitrosylated derivatives range between  $7.0 \times 10^{-2} M^{-1} s^{-1}$  and  $6.8 \times 10^1 M^{-1} s^{-1}$  (Table 3) ([25,26,29,31–35] and present study), reflecting the different structural and chemical features of the heme site [5,57–67]. Values of  $h_{on}$  for NO<sub>2</sub><sup>-</sup> binding to penta-coordinated ferrous Mt-trHbN, Cj-trHbP, carp myoglobin (Mb)-1, carp Mb-2, horse heart Mb, and sperm whale Mb, ranging between  $1.8 M^{-1} s^{-1}$  and  $1.6 \times 10^1 M^{-1} s^{-1}$ , are among the fastest observed (Table 3). Of note, the low reactivity of Mt-trHbO reflects the unfavorable ligand accessibility to the heme pocket due to the locked conformation(s) of the heme distal residues TyrCD1 and TrpG8 (Fig. 2) [18]. The very different values of the interconversion rate for the hexa- to penta-coordination of the heme-Fe(II) atom modulates kinetics of nitrite binding to *Synechocystis* Hb, *Arabidopsis thaliana* nonsymbiotic Hbs classes 1 and 2, and rice nonsymbiotic Hb class 1, human Cygb, and horse heart

cytochrome *c* [18,31,33,34]. Accordingly, changes of the  $h_{on}$  values for the nitrite-mediated conversion of ferrous human neuroglobin (Ngb) to its ferrous nitrosylated derivative (from  $1.2 \times 10^{-2} M^{-1} s^{-1}$  to  $1.2 \times 10^{-1} M^{-1} s^{-1}$ ) reflect the reversible redox-linked hexa-to-penta-coordination transition of the heme-Fe(II) atom. In fact, under oxidative conditions, the formation of the Cys46-Cys55 bridge stabilizes the high-reactive penta-coordinated heme-Fe(II) atom, thus facilitating the reaction. In contrast, under reductive conditions, the cleavage of the Cys46-Cys55 bridge leads to the formation of the low-reactive hexa-coordinated heme-Fe(II) atom [32]. Similarly, the inhibition of nitrite-dependent conversion of ferrous HSA-heme-Fe to the nitrosylated derivative reflects warfarin binding to the FA2 site with the concomitant penta-to-hexa coordination interconversion of the heme-Fe(II) atom [35]. Lastly, the nitrite-mediated conversion of ferrous human Hb to the nitrosylated derivative is modulated allosterically, inositol hexakisphosphate impairing the reactivity of ferrous human Hb stabilizing the low-reactivity T-state [25,26].

#### Reductive nitrosylation of Mt-trHbN(III), Mt-trHbO(III), and Cj-trHbP(III)

The reductive nitrosylation of Mt-trHbN(III), Mt-trHbO(III), and Cj-trHbP(III) occurs only at pH  $\geq$  8.4. Of note, Mt-trHbN(III)



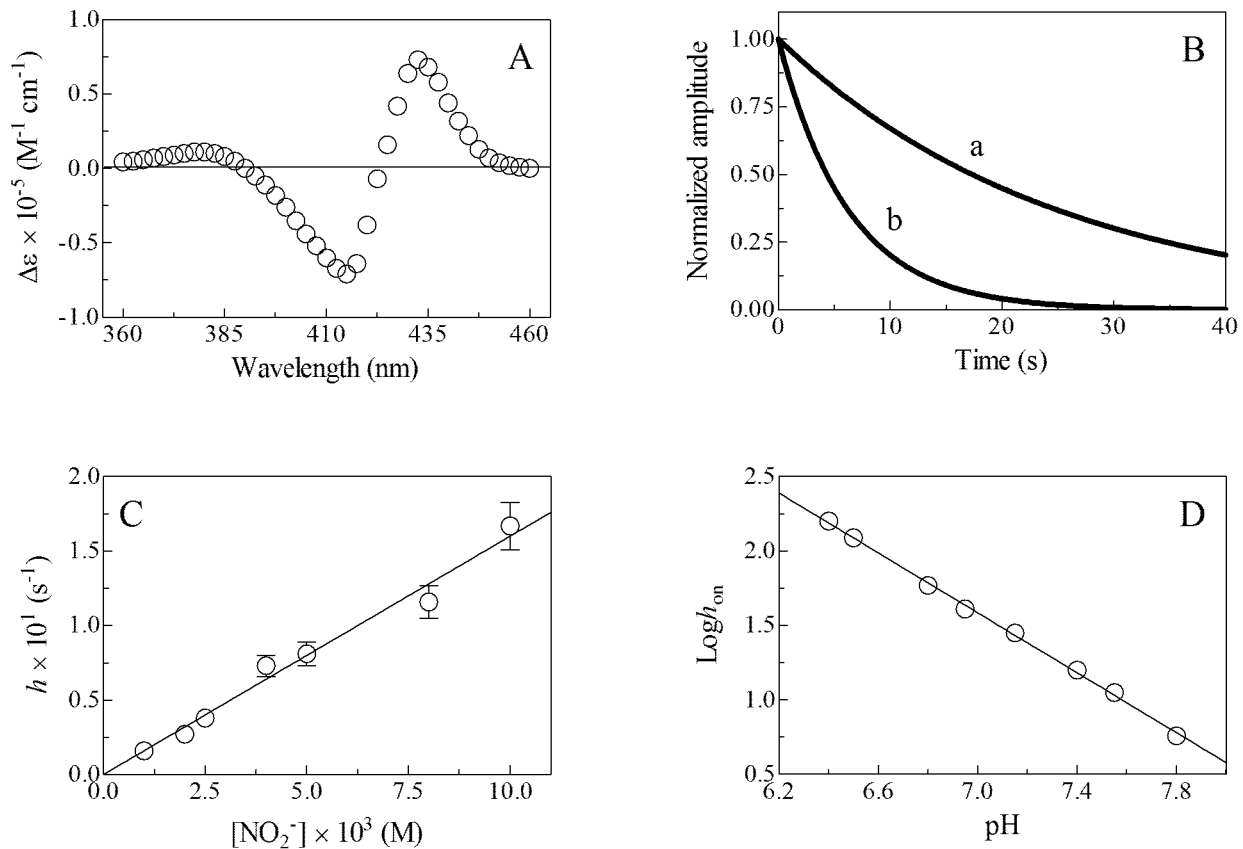

**Figure 4. Nitrite-mediated nitrosylation of Mt-trHbN(II), at 20.0°C.** (A) Difference absorbance spectrum of Mt-trHbN(II) minus Mt-trHbN(II)-NO, at pH 7.4. (B) Normalized averaged time courses of nitrite-mediated nitrosylation of Mt-trHbN(II), at pH 7.4. The nitrite concentration was  $2.5 \times 10^{-3}$  M (trace a) and  $1.0 \times 10^{-2}$  M (trace b). The time course analysis according to Eqn. (3) allowed the determination of the following values of  $h = 4.0 \times 10^{-2} \text{ s}^{-1}$  (trace a) and  $1.6 \times 10^{-1} \text{ s}^{-1}$  (trace b). (C) Dependence of  $h$  on  $[\text{NO}_2^-]$  for nitrite-mediated nitrosylation of Mt-trHbN(II), at pH 7.4. The continuous line was generated from Eqn. (4) with  $h_{\text{on}} = (1.6 \pm 0.2) \times 10^1 \text{ M}^{-1} \text{ s}^{-1}$ . (D) pH-Dependence of  $h_{\text{on}}$  for the nitrite-mediated nitrosylation of Mt-trHbN(II). The slope of the continuous line was  $-1.00 \pm 0.01$ . The Mt-trHbN(II) concentration was  $1.5 \times 10^{-6}$  M. Where not shown, standard deviation is smaller than the symbol. For details, see text. doi:10.1371/journal.pone.0102811.g004

binds reversibly NO without converting to Mt-trHbN(II)-NO at pH 7.5 [68].

Mixing Mt-trHbN(III), Mt-trHbO(III), and Cj-trHbP(III) with NO solutions (between pH 8.4 and 9.4, 20.0°C) induces a shift of the optical absorption maximum of the Soret band from 406–414 nm (*i.e.*, trHb(III)) to 420–422 nm (*i.e.*, trHb(III)-NO) (Fig. 5, and Figs S5 and S6 in File S1, panel A, and Table 1). Then, the optical absorption maximum of the Soret band shifts from 420–422 nm (*i.e.*, trHb(III)-NO) to 416–418 nm (*i.e.*, trHb(II)-NO) (Fig. 5, and Figs S5 and S6 in File S1, panel A, and Table 1). Absorbance spectra of Mt-trHbN(II)-NO, Mt-trHbO(II)-NO, and Cj-trHbP(II)-NO obtained mixing Mt-trHbN(III), Mt-trHbO(III), and Cj-trHbP(III) with NO solutions (Fig. 5, and Figs S5 and S6 in File S1, panel A, and Table 1) correspond to those obtained by: (i) adding gaseous NO to the Mt-trHbN(II), Mt-trHbO(II), and Cj-trHbP(II) solutions (Fig. 3, and Figs S1 and S2 in File S1, panel A, and Table 1), and (ii) mixing Mt-trHbN(II), Mt-trHbO(II), and Cj-trHbP(II) with nitrite solutions in the presence of dithionite (Fig. 4, and Figs S3 and S4 in File S1, panel A, and Table 1). Moreover, values of  $\lambda_{\text{max}}$  and  $\epsilon$  of the absorption spectra in the Soret region of Mt-trHbN, Mt-trHbO, and Cj-trHbP derivatives agree with those reported in the literature [8,20,21,45,46,68–70].

Over the whole NO concentration range explored, the time course for Mt-trHbN(III), Mt-trHbO(III), and Cj-trHbP(III)

reductive nitrosylation corresponds to a biphasic process (Fig. 5, and Figs S5 and S6 in File S1, panel B); values of  $l$  and  $b$  are wavelength-independent at fixed NO concentration (data not shown).

The first step of kinetics for Mt-trHbN(III), Mt-trHbO(III), and Cj-trHbP(III) reductive nitrosylation (indicated by  $l$  in Scheme C) is a bimolecular process as observed under pseudo-first order conditions (Fig. 5, and Figs S5 and S6 in File S1, panel C) at all the pH values investigated. Plots of  $l$  versus  $[\text{NO}]$  are linear (Eqn. (6)), the slope corresponding to  $l_{\text{on}}$ . Values of the second-order rate constant  $l_{\text{on}}$  over the pH range explored (*i.e.*, from pH 8.4 to 9.4; Tables S1–S3 in File S1) vary between  $1.1 \times 10^5 \text{ M}^{-1} \text{ s}^{-1}$  and  $2.3 \times 10^5 \text{ M}^{-1} \text{ s}^{-1}$  (for Mt-trHbN(III)), between  $8.5 \times 10^3 \text{ M}^{-1} \text{ s}^{-1}$  and  $2.1 \times 10^4 \text{ M}^{-1} \text{ s}^{-1}$  (for Mt-trHbO(III)), and between  $8.9 \times 10^4 \text{ M}^{-1} \text{ s}^{-1}$  and  $1.7 \times 10^5 \text{ M}^{-1} \text{ s}^{-1}$  (for Cj-trHbP(III)). The y intercept of plots of  $l$  versus  $[\text{NO}]$  corresponds to the dissociation rate constant  $l_{\text{off}}$  (Eqn. (6)), whose values over the pH range explored (*i.e.*, from pH 8.4 to 9.4; Tables S1–S3 in File S1) vary between  $1.5 \text{ s}^{-1}$  and  $2.3 \text{ s}^{-1}$  (for Mt-trHbN(III)), between  $1.3 \text{ s}^{-1}$  and  $2.4 \text{ s}^{-1}$  (for Mt-trHbO(III)), and between  $5.9 \text{ s}^{-1}$  and  $8.3 \text{ s}^{-1}$  (for Cj-trHbP(III)).

Between pH 8.4 and pH 9.4, the molar fraction of trHb(III)-NO (*i.e.*,  $\alpha$ , Eqn. (7)) increases as a function of free  $[\text{NO}]$ , tending to level off at  $[\text{NO}] > 10 \times L$ ; the analysis of data according to Eqn.

**Table 3.** Values of the second-order rate constant for the nitrite-mediated nitrosylation of ferrous globins.

| Heme-protein                                        | $k_{on}$ ( $M^{-1} s^{-1}$ ) |                      |
|-----------------------------------------------------|------------------------------|----------------------|
| Mt-trHbN <sup>a</sup>                               | $1.6 \times 10^1$            |                      |
| Mt-trHbO <sup>a</sup>                               | $3.8 \times 10^{-1}$         |                      |
| Cj-trHbP <sup>a</sup>                               | 4.3                          |                      |
| <i>Synechocystis</i> Hb <sup>b</sup>                | $6.8 \times 10^1$            |                      |
| <i>Arabidopsis thaliana</i> Hb class 1 <sup>c</sup> | $2.0 \times 10^1$            |                      |
| <i>Arabidopsis thaliana</i> Hb class 2 <sup>c</sup> | 4.9                          |                      |
| Rice non symbiotic Hb class 1 <sup>b</sup>          | $3.3 \times 10^1$            |                      |
| Carp Mb-1 <sup>d</sup>                              | 5.3                          |                      |
| Carp Mb-2 <sup>d</sup>                              | 1.8                          |                      |
| Horse heart Mb <sup>e</sup>                         | 2.9                          |                      |
| Sperm whale Mb <sup>f</sup>                         | 6.0                          |                      |
|                                                     | HisE7Ala <sup>e</sup>        | 1.8                  |
|                                                     | HisE7Leu <sup>e</sup>        | <0.2                 |
| Mouse Ngb <sup>g</sup>                              | 5.1                          |                      |
| Human Cygb <sup>h</sup>                             | $1.4 \times 10^{-1}$         |                      |
| Human Ngb                                           | Cys46-Cys55 <sup>e,i</sup>   | $1.2 \times 10^{-1}$ |
|                                                     | Cys46/Cys55 <sup>e,j</sup>   | $1.2 \times 10^{-2}$ |
| Tetrameric human Hb                                 | T state <sup>f</sup>         | $1.2 \times 10^{-1}$ |
|                                                     | R state <sup>f</sup>         | 6.0                  |
| Horse heart cytochrome c <sup>k</sup>               |                              | $7.0 \times 10^{-2}$ |
| HSA-heme-Fe <sup>l</sup>                            |                              | 1.3                  |
| Warfarin-HSA-heme-Fe(II) <sup>l</sup>               |                              | $9.3 \times 10^{-2}$ |

<sup>a</sup>pH 7.4 and 20.0°C. Present study.

<sup>b</sup>pH 7.0; unknown temperature [31].

<sup>c</sup>pH 7.4 and 25.0°C. From [34].

<sup>d</sup>pH 7.6 and 25.0°C. From [90].

<sup>e</sup>pH 7.4 and 25.0°C. From [32].

<sup>f</sup>pH 7.4 and 25.0°C. From [25].

<sup>g</sup>pH 7.4 and 25.0°C. From [29].

<sup>h</sup>pH 7.0 and 25.0°C. From [33].

<sup>i</sup>In "Human Ngb Cys46-Cys55", the Cys46 and Cys55 residues form an intramolecular disulphide bond.

<sup>j</sup>In "Human Ngb Cys46/Cys55", the Cys46 and Cys55 residues do not form the intramolecular disulphide bond.

<sup>k</sup>pH 7.4 and 25.0°C. From [33].

<sup>l</sup>pH 7.4 and 20.0°C. From [35].

doi:10.1371/journal.pone.0102811.t003

(7) allowed to calculate values of  $L$  (Fig. 5, and Figs S5 and S6 in File S1, panel D). Values of  $L$  over the pH range explored (*i.e.*, from pH 8.4 to 9.4; Tables S1–S3 in File S1) vary between  $9.3 \times 10^{-6}$  M and  $1.9 \times 10^{-5}$  M (for Mt-trHbN(III)), between  $9.8 \times 10^{-5}$  M and  $2.1 \times 10^{-4}$  M (for Mt-trHbO(III)), and between  $3.1 \times 10^{-5}$  M and  $7.9 \times 10^{-5}$  M (for Cj-trHbP(III)). According to the trHb(III):NO 1:1 stoichiometry of reaction Ca in Scheme C, the Hill coefficient  $n$  is  $1.00 \pm 0.02$ . As expected for a simple system [23], values of  $L$  correspond to those of  $l_{off}/l_{on}$ , under all experimental conditions (Table 4 and Tables S1–S3 in File S1).

The second step of kinetics for Mt-trHbN(III), Mt-trHbO(III), and Cj-trHbP(III) reductive nitrosylation (indicated by Cb-Cd in Scheme C) follows a [NO]-independent monomolecular behavior (Fig. 5, and Figs S5 and S6 in File S1, panel E) at all the pH values investigated. According to Scheme C, the value of  $b$  increases linearly on increasing  $[OH^-]$  (*i.e.*, from pH 8.4 to 9.4; Fig. 5, and Figs S5 and S6 in File S1, panel F, and Tables S1–S3 in File S1). The slope and the  $y$  intercept of the plot of  $b$  versus  $[OH^-]$  correspond to  $b_{OH^-}$  and  $b_{H_2O}$  values. Values of  $b_{OH^-}$  and  $b_{H_2O}$  for for Mt-trHbN(III), Mt-trHbO(III), and Cj-trHbP(III) reductive nitrosylation are  $1.7 \times 10^2 M^{-1} s^{-1}$  and  $6.4 \times 10^{-4} s^{-1}$ ,

$2.4 \times 10^2 M^{-1} s^{-1}$  and  $2.9 \times 10^{-4} s^{-1}$ , and  $9.1 \times 10^2 M^{-1} s^{-1}$  and  $4.8 \times 10^{-4} s^{-1}$ , respectively (Table 4).

Over the whole pH range explored (*i.e.*, from pH 8.4 to 9.4), the reductive nitrosylation of Mt-trHbN(III), Mt-trHbO(III), and Cj-trHbP(III) is an irreversible process, as the spectra of Mt-trHbN(II)-NO, Mt-trHbO(II)-NO, and Cj-trHbP(II)-NO revert to Mt-trHbN(II), Mt-trHbO(II), and Cj-trHbP(II) instead of Mt-trHbN(III), Mt-trHbO(III), and Cj-trHbP(III) by merely pumping off gaseous NO or bubbling helium through the Mt-trHbN(II)-NO, Mt-trHbO(II)-NO, and Cj-trHbP(II)-NO solutions; however, the denitrosylation process (*i.e.*, the Mt-trHbN(II), Mt-trHbO(II), and Cj-trHbP(II) formation) needs about 12 hours to be completed.

Under all experimental conditions, free Mt-trHbN(II), Mt-trHbO(II), and Cj-trHbP(II) was never detected spectrophotometrically because of the very rapid reaction of Mt-trHbN(II), Mt-trHbO(II), and Cj-trHbP(II) with NO ( $k_{on} \geq 8.6 \times 10^5 M^{-1} s^{-1}$ ; Table 1).

Ferric Mt-trHbN, Cj-trHbP, *Methanosarcina acetivorans* protoglobin (Ma-Pgb), horse heart Mb, sperm whale Mb, and HSA-heme-Fe react rapidly with NO ([41,43,48,55] and present study),

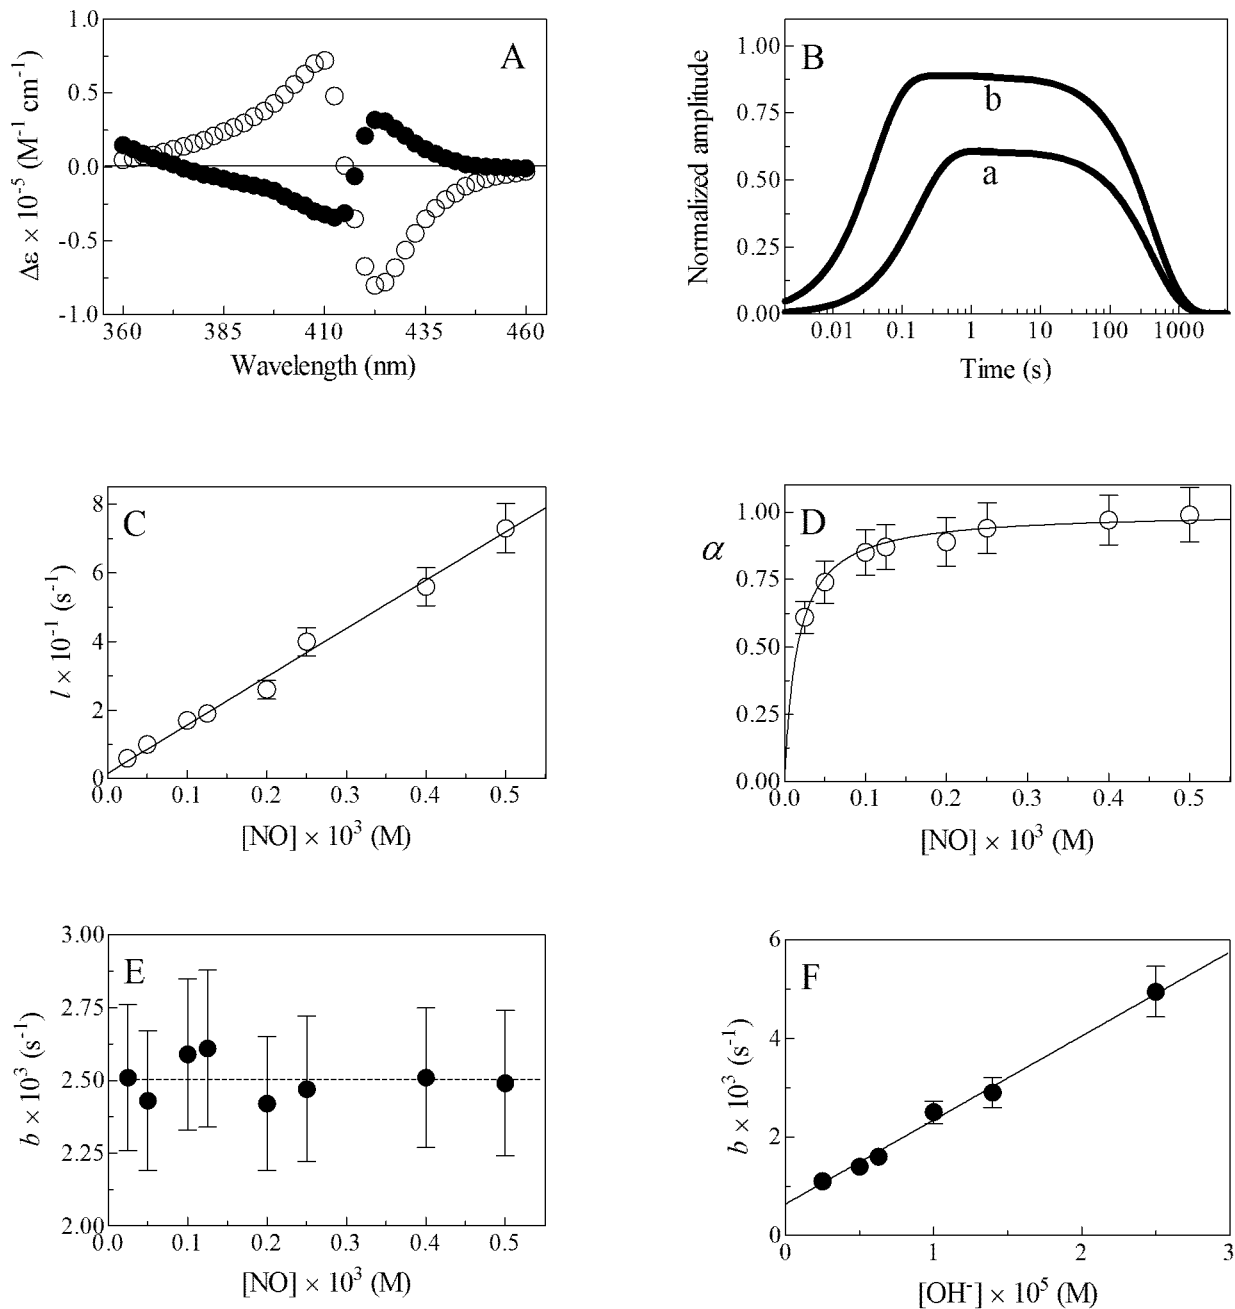

**Figure 5. Reductive nitrosylation of Mt-trHbN(III), at 20.0°C.** (A) Difference absorbance spectra of Mt-trHbN(III) minus Mt-trHbN(III)-NO and of Mt-trHbN(III)-NO minus Mt-trHbN(II)-NO (open and filled circles, respectively), at pH 9.0. (B) Normalized averaged time courses of Mt-trHbN(III) reductive nitrosylation, at pH 9.0. The NO concentration was  $2.5 \times 10^{-5} \text{ M}$  (trace a) and  $2.0 \times 10^{-4} \text{ M}$  (trace b). The time course analysis according to Eqns (5a)–(5c) allowed the determination of the following values of parameters  $\alpha$ ,  $l$ , and  $b$ : trace a -  $\alpha=0.61$ ,  $l=6.0 \text{ s}^{-1}$ , and  $b=2.5 \times 10^{-3} \text{ s}^{-1}$ ; and trace b -  $\alpha=0.89$ ,  $l=2.6 \times 10^1 \text{ s}^{-1}$ , and  $b=2.4 \times 10^{-3} \text{ s}^{-1}$ . (C) Dependence of  $l$  on  $[\text{NO}]$  for Mt-trHbN(III) reductive nitrosylation, at pH 9.0. The continuous line was generated from Eqn. (6) with  $l_{\text{on}}=(1.4 \pm 0.2) \times 10^5 \text{ M}^{-1} \text{ s}^{-1}$  and  $l_{\text{off}}=1.6 \pm 0.2 \text{ s}^{-1}$ . (D) Dependence of  $\alpha$  on  $[\text{NO}]$  for Mt-trHbN(III) reductive nitrosylation, at pH 9.0. The continuous line was generated from Eqn. (7) with  $L=(1.6 \pm 0.2) \times 10^{-5} \text{ M}$ . (E) Dependence of  $b$  on  $[\text{NO}]$  for Mt-trHbN(III) reductive nitrosylation, at pH 9.0. The average  $b$  value is  $2.5 \times 10^{-3} \text{ s}^{-1}$  (dashed line). (F) Dependence of  $b$  on  $[\text{OH}^-]$  for Mt-trHbN(III) reductive nitrosylation. The continuous line was generated from Eqn. (8) with  $b_{\text{OH}^-}=(1.7 \pm 0.2) \times 10^2 \text{ M}^{-1} \text{ s}^{-1}$  and  $b_{\text{H}_2\text{O}}=(6.4 \pm 0.7) \times 10^{-4} \text{ s}^{-1}$ . The Mt-trHbN(III) concentration was  $1.5 \times 10^{-6} \text{ M}$ . Where not shown, standard deviation is smaller than the symbol. For details, see text. doi:10.1371/journal.pone.0102811.g005

even though the binding of a weak exogenous ligand (*i.e.*, a water molecule) occurs likely at the sixth coordination position of the heme-Fe(III) atom [5,57,58,66,67,71]. As reported above, the low reactivity of Mt-trHbO reflects the unfavorable ligand accessibility to the heme distal pocket [18]. Unexpectedly, the very low value of

$l_{\text{on}}$  for the reductive nitrosylation of penta-coordinated *Scapharca inaequivalvis* HbI may reflect either the non-occurrence of the heme-Fe(III)-NO intermediate or the concomitant nitrosation of the Cys92 residue affecting the heme-Fe reactivity [38]. On the other hand, the reactivity of ferric hexa-coordinated *Glycine max*

**Table 4.** Values of kinetic and thermodynamic parameters for reductive nitrosylation of ferric heme-proteins.

| Heme-protein                       | $k_{on}$ ( $M^{-1} s^{-1}$ ) | $k_{off}$ ( $s^{-1}$ ) | $L$ (M)               | $k_{off}/k_{on}$ (M)     | $k_{OH-}$ ( $M^{-1} s^{-1}$ ) | $k_{H_2O}$ ( $s^{-1}$ ) |
|------------------------------------|------------------------------|------------------------|-----------------------|--------------------------|-------------------------------|-------------------------|
| Mt-tHbN                            | $1.4 \times 10^{5a}$         | $1.6^a$                | $1.6 \times 10^{-5a}$ | $1.1 \times 10^{-5a}$    | $1.7 \times 10^{2b}$          | $6.4 \times 10^{-4b}$   |
| Mt-tHbO                            | $9.2 \times 10^{3a}$         | $2.1^a$                | $1.9 \times 10^{-4a}$ | $2.3 \times 10^{-4a}$    | $2.4 \times 10^{2b}$          | $2.9 \times 10^{-4b}$   |
| Cj-trHbP                           | $1.1 \times 10^{5a}$         | $8.1^a$                | $6.5 \times 10^{-5a}$ | $7.4 \times 10^{-5a}$    | $9.1 \times 10^{2b}$          | $4.8 \times 10^{-4b}$   |
| Ma-Pgb                             | $4.8 \times 10^{4c}$         | $2.6^c$                | $6.1 \times 10^{-5c}$ | $5.4 \times 10^{-5c}$    | $2.9 \times 10^{3d}$          | $4.1 \times 10^{-4d}$   |
| <i>Glycine max</i> Lb <sup>e</sup> | $1.4 \times 10^{5e}$         | $3.0^e$                | $2.1 \times 10^{-5e}$ | $2.1 \times 10^{-5e}$    | $3.3 \times 10^{3f}$          | $3.0 \times 10^{-4f}$   |
| <i>Scapharca inaequivalvis</i> HbI | $3.2 \times 10^{1g}$         | $<1 \times 10^{-3g}$   | n.d.                  | $3.1 \times 10^{-5g}$    | $>2 \times 10^{6h}$           | n.d.                    |
| Horse heart Mb                     | $6.8 \times 10^{4i}$         | $5.2^i$                | $1.2 \times 10^{-4i}$ | $7.6 \times 10^{-5i}$    | $3.9 \times 10^{2j}$          | n.d.                    |
| Sperm whale Mb                     | $1.9 \times 10^{3k}$         | $1.4 \times 10^l$      | $7.7 \times 10^{-5k}$ | n.d.                     | $3.2 \times 10^{2m}$          | n.d.                    |
| Human Ngb                          | $2.1 \times 10^{1o}$         | $2.5 \times 10^{-3o}$  | n.d.                  | $1.2 \times 10^{-4p}$    | $\geq 2 \times 10^{6q}$       | n.d.                    |
| Cys46-Cys55 <sup>n</sup>           | $2.9^o$                      | $2.0 \times 10^{-3o}$  | n.d.                  | $1.9 \times 10^{-4p}$    | $\geq 5 \times 10^{5q}$       | n.d.                    |
| Cys46/Cys55 <sup>r</sup>           | n.d.                         | n.d.                   | n.d.                  | n.d.                     | $3.2 \times 10^{3t}$          | $1.1 \times 10^{-3t}$   |
| Tetrameric human Hb                | n.d.                         | n.d.                   | $8.3 \times 10^{-5s}$ | n.d.                     | $1.5 \times 10^{3n}$          | n.d.                    |
| Horse cytochrome c                 | n.d.                         | n.d.                   | $7.1 \times 10^{-5u}$ | n.d.                     | $4.4 \times 10^{3w}$          | $3.5 \times 10^{-4w}$   |
| HSA-heme-Fe                        | $2.1 \times 10^{4v}$         | $3.1 \times 10^{-1v}$  | $1.8 \times 10^{-5v}$ | $1.5 \times 10^{-5v}$    | $\geq 7 \times 10^{5y}$       | n.d.                    |
| Rabbit HPX-heme-Fe                 | $1.3 \times 10^{1x}$         | $\leq 10^{-4x}$        | n.d.                  | $\leq 8 \times 10^{-6x}$ |                               |                         |

<sup>a</sup>pH 9.0 and 20.0°C. Present study.  
<sup>b</sup>20.0°C. Present study.  
<sup>c</sup>pH 7.2 and 22.0°C. From [43].  
<sup>d</sup>22.0°C. From [43].  
<sup>e</sup>pH 7.3 and 20.0°C. From [39].  
<sup>f</sup>20.0°C. From [39].  
<sup>g</sup>pH 7.5 and 20.0°C. From [38].  
<sup>h</sup>Derived from values of  $b$  and  $[OH^-]$  [38], at 20.0°C.  
<sup>i</sup>pH 9.2 and 20.0°C. From [41].  
<sup>j</sup>Derived from values of  $b$  and  $[OH^-]$  [41], at 20.0°C.  
<sup>k</sup>pH 8.79 and room temperature. From [37].  
<sup>l</sup>Derived from values of  $k_{on}$  and  $L$  [37], at pH 8.79 and room temperature.  
<sup>m</sup>Room temperature. From [37].  
<sup>n</sup>In "Human Ngb Cys46-Cys55", the Cys46 and Cys55 residues form an intramolecular disulphide bond.  
<sup>o</sup>pH 7.0 and room temperature. From [74].  
<sup>p</sup>Derived from values of  $k_{on}$  and  $k_{off}$  [74], at room temperature.  
<sup>q</sup>Derived from values of  $b$  and  $[OH^-]$  [74], at pH 7.0 and room temperature.  
<sup>r</sup>In "Human Ngb Cys46/Cys55", the Cys46 and Cys55 residues do not form the intramolecular disulphide bond.  
<sup>s</sup>pH 7.1 and room temperature. From [37].  
<sup>t</sup>Room temperature. From [37].  
<sup>u</sup>pH 8.35 and room temperature. From [37].  
<sup>v</sup>pH 7.5 and 20.0°C. From [42].  
<sup>w</sup>20.0°C. From [42].  
<sup>x</sup>pH 7.0 and 10.0°C. From [40].  
<sup>y</sup>10.0°C. From [40].  
 n.d., not determined.  
 doi:10.1371/journal.pone.0102811.t004

Lb, horse cytochrome *c*, and rabbit HPX-heme-Fe ([37,39,40,72] and present study) reflects the hexa- to penta-coordination conversion of the heme-Fe atom ([59,65,73] and present study) (Table 4). As reported for the nitrite-mediated nitrosylation of ferrous human Ngb [32] (Table 3), NO binding to ferric human Ngb is modulated by the formation and cleavage of the Cys46-Cys55 disulphide bridge [74].

Values of  $l_{\text{off}}$  for NO dissociation from nitrosylated heme-Fe(III) proteins span over five orders of magnitude (Table 4) ([37–43,74] and present study), reflecting the different stabilization mode of the heme-Fe bound ligand by heme distal residues [5,54,58,59,66,71,73,75–79].

Although values of  $l_{\text{on}}$  and  $l_{\text{off}}$  NO binding to heme-Fe(III) proteins are very different (Table 4) ([37–43,74] and present study), values of  $L (=l_{\text{off}}/l_{\text{on}})$  are similar (Table 4) ([37–43,74] and present study), indicating the occurrence of kinetic compensation phenomena.

Values of  $b_{\text{OH}^-}$  for reductive nitrosylation of heme-Fe(III) proteins, spanning over four orders of magnitude (Table 4) ([37–43,74] and present study), possibly reflect either the different  $\text{OH}^-$  accessibility to the heme pocket ([5,23,58–60,63,64,67,71,75,80–84]) or the heme-Fe(III) protein reduction potentials [37,39]. Although the values of  $b_{\text{OH}^-}$  and  $b_{\text{H}_2\text{O}}$  cannot be compared directly,  $\text{OH}^-$  ions catalyze reductive nitrosylation of heme-Fe(II)- $\text{NO}^+$  much more efficiently than  $\text{H}_2\text{O}$ . Moreover, the linear dependence of  $b$  on  $[\text{OH}^-]$  indicates that no additional elements appear to be involved in irreversible reductive nitrosylation of Mt-trHbN, Mt-trHbO, and Cj-trHbP (present study), as previously reported for related heme-Fe(III) proteins (reaction (c) in Scheme C; Fig. 5, and Figs S5 and S6 in File S1, panel E) [37–43,74].

Reductive nitrosylation of most ferric heme-proteins is limited by the  $\text{OH}^-$ -mediated reduction of the heme-Fe(II)- $\text{NO}^+$  complex to heme-Fe(II) (reaction (c) in Scheme C) [37–39,41–43,74]. By contrast, NO binding to hexa-coordinated horse cytochrome *c* and ferric rabbit HPX-heme (reaction (a) in Scheme C) represents the rate-limiting step [37,40] (Tables 2 and 4 for comparison).

## Conclusion and Perspectives

The occurrence of different types of trHbs (*i.e.*, trHbN, trHbO and trHbP) in bacteria, plants and some unicellular eukaryotes (Fig. 1) opens the question of their role, also in view of their frequently simultaneous presence in the same organism; this envisages the possibility that different types of trHbs reflect different physiological roles in these organisms [1–6,11].

The high reactivity of Mt-trHbN and Cj-trHbP reflects both the penta-coordination of the heme-Fe-atom and the ligand accessibility to the heme pocket (Fig. 2). Indeed, the ligand access pathway through protein matrix tunnels in penta-coordinated Mt-trHbN (Fig. 2) [5,83] and the E7-path in penta-coordinated Cj-trHbP (Fig. 2) [5,22,66] is characterized by the lowest energy barrier, with values close to those displayed by penta-coordinated sperm whale Mb. Of note, ligand entry to and exit from the heme distal pocket of sperm whale Mb is modulated by gating

movement of the HisE7 residue [75]. In contrast, the low reactivity of penta-coordinated Mt-trHbO [21] reflects H-bond interactions that lock the heme distal residues TyrCD1 and TrpG8 into a conformation(s) that limits ligand access to the heme distal pocket (Fig. 2) [18,70]. Of note, the E7-path appears to sustain ligand diffusion to the heme distal cavity of Mt-trHbO; indeed, Mt-trHbO hosts two protein matrix cavities instead of the protein matrix tunnel occurring in Mt-trHbN (Fig. 2) [84].

*M. tuberculosis* is massively exposed to NO during its intramacrophagic life, and Mt-trHbN has been shown to play a prominent role in protection from nitrosative stress [16]. Therefore, Mt-trHbN is most likely to function as NO dioxygenase that converts toxic NO into harmless nitrate in the presence of oxygen, and relieves toxicity due to NO and nitrosative stress. This is also consistent with the NO-inducible response of the gene encoding for trHbN in *M. tuberculosis*, both *in vitro* and inside infected macrophages [85]. Of note, also the promoter of the trHbO gene is induced during macrophage infection, though it poorly responds to NO induction [85]. Based on biochemical data, the evidence of trHbO in protection from NO is weak, while it is more likely that this protein is involved in oxygen sensing and aerobic respiration [86]. Similar considerations could hold true for the enteric pathogen *C. jejuni*, which colonizes the intestinal tract of birds and can cause enteritis in humans. Like other pathogens, *C. jejuni* is exposed to NO and other nitrosating species during host infection [87], the expression of both bacterial Cj-trHbP and 3-on-3 globin being upregulated by NO [11]. The 3-on-3 globin plays the major role in resistance to nitrosative stress and aerobically converts NO to nitrate [88], whereas the contribution of trHbP is less prominent. In contrast, both globins are devoid of NO-protective activity under oxygen-limited conditions that normally exist *in vivo* [89]. Therefore, the role of Cj-trHbP is clearly distinct from that of the 3-on-3 globin, being related to  $\text{O}_2$  metabolism [7,8], likely performing a peroxidase or P450-type of oxygen chemistry [9].

As a whole, the comparison of the biochemical properties of microbial globins, including trHbs, will allow to shed light on their functional diversification and on the molecular bases of microbe ecology.

## Supporting Information

**File S1 Supporting tables and figures.**  
(DOCX)

## Acknowledgments

Authors wish to thank Prof. Martino Bolognesi for helpful discussions.

## Author Contributions

Conceived and designed the experiments: PA PV MC. Performed the experiments: AdM GRT AP. Analyzed the data: PA PV MC. Contributed reagents/materials/analysis tools: PA AP. Contributed to the writing of the manuscript: PA PV MC.

## References

- Vinogradov SN, Hoogewijs D, Bailly X, Arredondo-Peter R, Guertin M, et al. (2005) Three globin lineages belonging to two structural classes in genomes from the three kingdoms of life. *Proc Natl Acad Sci USA* 102: 11385–11389.
- Vinogradov SN, Hoogewijs D, Bailly X, Mizuguchi K, Dewilde S, et al. (2007) A model of globin evolution. *Gene* 398: 132–142.
- Vuletic DA, Lecomte JT (2006) A phylogenetic and structural analysis of truncated hemoglobins. *J Mol Evol* 62: 196–210.
- Ascenzi P, Bolognesi M, Milani M, Guertin M, Visca P (2007) Mycobacterial truncated hemoglobins: from genes to functions. *Gene* 398: 42–51.
- Pesce A, Bolognesi M, Nardini M (2013) The diversity of 2/2 (truncated) globins. *Adv Microb Physiol* 63: 49–78.
- Vinogradov SN, Tinajero-Trejo M, Poole RK, Hoogewijs D (2013) Bacterial and archaeal globins - a revised perspective. *Biochim Biophys Acta* 1834: 1789–1800.
- Wainwright LM, Elvers KT, Park SF, Poole RK (2005) A truncated haemoglobin implicated in oxygen metabolism by the microaerophilic food-borne pathogen *Campylobacter jejuni*. *Microbiology* 151: 4079–4091.
- Wainwright LM, Wang Y, Park SF, Yeh SR, Poole RK (2006) Purification and spectroscopic characterization of Ctb, a group III truncated hemoglobin

- implicated in oxygen metabolism in the food-borne pathogen *Campylobacter jejuni*. *Biochemistry* 45: 6003–6011.
9. Lu C, Egawa T, Wainwright LM, Poole RK, Yeh SR (2007) Structural and functional properties of a truncated hemoglobin from a food-borne pathogen *Campylobacter jejuni*. *J Biol Chem* 282: 13627–13636.
  10. Gupta S, Pawaria S, Lu C, Hade MD, Singh C, et al. (2012) An unconventional hexacoordinated flavohemoglobin from *Mycobacterium tuberculosis*. *J Biol Chem* 287: 16435–16446.
  11. Tinajero-Trejo M, Shepherd M (2013) The globins of *Campylobacter jejuni*. *Adv Microb Physiol* 63: 97–145.
  12. Ascenzi P, Visca P (2008) Scavenging of reactive nitrogen species by mycobacterial truncated hemoglobins. *Methods Enzymol* 436: 317–337.
  13. Davidge KS, Dikshit KL (2013) Haemoglobins of Mycobacteria: structural features and biological functions. *Adv Microb Physiol* 63: 147–194.
  14. Ascenzi P, Coletta A, Cao Y, Trezza V, Leboffe L, et al. (2013) Isoniazid inhibits the heme-based reactivity of *Mycobacterium tuberculosis* truncated hemoglobin N. *Plos One* 8: e69762.
  15. Arya S, Sethi D, Singh S, Hade MD, Singh V, et al. (2013) Truncated hemoglobin, HbN, is post-translationally modified in *Mycobacterium tuberculosis* and modulates host-pathogen interactions during intracellular infection. *J Biol Chem* 288: 29987–29999.
  16. Ouellet H, Ouellet Y, Richard C, Labarre M, Wittenberg B, et al. (2002) Truncated hemoglobin HbN protects *Mycobacterium bovis* from nitric oxide. *Proc Natl Acad Sci USA* 99: 5902–5907.
  17. Pathania R, Navani NK, Gardner AM, Gardner PR, Dikshit KL (2002) Nitric oxide scavenging and detoxification by the *Mycobacterium tuberculosis* haemoglobin, HbN in *Escherichia coli*. *Mol Microbiol* 45: 1303–1314.
  18. Ouellet H, Juszcak D, Dantsker D, Samuni U, Ouellet YH, et al. (2003) Reactions of *Mycobacterium tuberculosis* truncated hemoglobin O with ligands reveal a novel ligand-inclusive hydrogen bond network. *Biochemistry* 42: 5764–5774.
  19. Ouellet H, Rangelova K, Labarre M, Wittenberg JB, Wittenberg BA, et al. (2007) Reaction of *Mycobacterium tuberculosis* truncated hemoglobin O with hydrogen peroxide: evidence for peroxidatic activity and formation of protein-based radicals. *J Biol Chem* 282: 7491–7503.
  20. Couture M, Yeh S, Wittenberg BA, Wittenberg JB, Ouellet Y, et al. (1999) A cooperative oxygen-binding hemoglobin from *Mycobacterium tuberculosis*. *Proc Natl Acad Sci USA* 96: 11223–11228.
  21. Mukai M, Savard PY, Ouellet H, Guertin M, Yeh SR (2002) Unique ligand-protein interactions in a new truncated hemoglobin from *Mycobacterium tuberculosis*. *Biochemistry* 41: 3897–3905.
  22. Nardini M, Pesce A, Labarre M, Richard C, Bolli A, et al. (2006) Structural determinants in the group III truncated hemoglobin from *Campylobacter jejuni*. *J Biol Chem* 281: 37803–37812.
  23. Antonini E, Brunori M (1971) Hemoglobin and Myoglobin in their Reactions with Ligands. Amsterdam: North-Holland Publishing Co.
  24. Doyle MP, Pickering RA, DeWeert TM, Hoekstra JW, Pater D (1981) Kinetics and mechanism of the oxidation of human deoxyhemoglobin by nitrites. *J Biol Chem* 256: 12393–12398.
  25. Huang Z, Shiva S, Kim-Shapiro DB, Patel RP, Ringwood LA, et al. (2005) Enzymatic function of hemoglobin as a nitrite reductase that produces NO under allosteric control. *J Clin Invest* 115: 2099–2107.
  26. Huang KT, Keszler A, Patel N, Patel RP, Gladwin MT, et al. (2005) The reaction between nitrite and deoxyhemoglobin: reassessment of reaction kinetics and stoichiometry. *J Biol Chem* 280: 31126–31131.
  27. Shiva S, Huang Z, Grubina R, Sun J, Ringwood LA, et al. (2007) Deoxymyoglobin is a nitrite reductase that generates nitric oxide and regulates mitochondrial respiration. *Circ Res* 100: 654–661.
  28. Grubina R, Basu S, Tiso M, Kim-Shapiro DB, Gladwin MT (2008) Nitrite reductase activity of hemoglobin S (sickle) provides insight into contributions of heme redox potential versus ligand affinity. *J Biol Chem* 283: 3628–3638.
  29. Petersen MG, Dewilde S, Fago A (2008) Reactions of ferrous neuroglobin and cytoglobin with nitrite under anaerobic conditions. *J Inorg Biochem* 102: 1777–1782.
  30. Salhany JM (2008) Kinetics of reaction of nitrite with deoxy hemoglobin after rapid deoxygenation or predeoxygenation by dithionite measured in solution and bound to the cytoplasmic domain of band 3 (SLC4A1). *Biochemistry* 47: 6059–6072.
  31. Sturms R, DiSpirito AA, Hargrove MS (2011) Plant and cyanobacterial hemoglobins reduce nitrite to nitric oxide under anoxic conditions. *Biochemistry* 50: 3873–3878.
  32. Tiso M, Tejero J, Basu S, Azarov I, Wang X, et al. (2011) Human neuroglobin functions as a redox-regulated nitrite reductase. *J Biol Chem* 286: 18277–18289.
  33. Li H, Hemann C, Abdelghany TM, El-Mahdy MA, Zweier JL (2012) Characterization of the mechanism and magnitude of cytoglobin-mediated nitrite reduction and nitric oxide generation under anaerobic conditions. *J Biol Chem* 287: 36623–36633.
  34. Tiso M, Tejero J, Kenney C, Frizzell S, Gladwin MT (2012) Nitrite reductase activity of nonsymbiotic hemoglobins from *Arabidopsis thaliana*. *Biochemistry* 51: 5285–5292.
  35. Ascenzi P, Tundo GR, Fanali G, Coletta M, Fasano M (2013) Warfarin modulates the nitrite-reductase activity of ferrous human serum heme-albumin. *J Biol Inorg Chem* 18: 939–946.
  36. Hoshino M, Ozawa K, Seki H, Ford PC (1993) Photochemistry of nitric oxide adducts of water-soluble iron(III) porphyrin and ferrihemoproteins studied by nanosecond laser photolysis. *J Am Chem Soc* 115: 9568–9575.
  37. Hoshino M, Maeda M, Konishi R, Seki H, Ford PC (1996) Studies on the reaction mechanism for reductive nitrosylation of ferrihemoproteins in buffer solutions. *J Am Chem Soc* 118: 5702–5707.
  38. Boffi A, Sarti P, Amiconi G, Chiancone E (2002) The interplay between heme iron and protein sulfhydryls in the reaction of dimeric *Scapharca inaequivalvis* hemoglobin with nitric oxide. *Biophys Chem* 98: 209–216.
  39. Herold S, Puppo A (2005) Kinetics and mechanistic studies of the reactions of metleghemoglobin, ferrylleghemoglobin, and nitrosylleghemoglobin with reactive nitrogen species. *J Biol Inorg Chem* 10: 946–957.
  40. Ascenzi P, Bocedi A, Antonini G, Bolognesi M, Fasano M (2007) Reductive nitrosylation and peroxynitrite-mediated oxidation of heme-hemopexin. *FEBS J* 274: 551–562.
  41. Ascenzi P, di Masi A, Gullotta F, Mattu M, Ciaccio C, et al. (2010) Reductive nitrosylation of ferric cyanide horse heart myoglobin is limited by cyanide dissociation. *Biochem Biophys Res Commun* 393: 196–200.
  42. Ascenzi P, Cao Y, di Masi A, Gullotta F, De Sanctis G, et al. (2010) Reductive nitrosylation of ferric human serum heme-albumin. *FEBS J* 277: 2474–2485.
  43. Ascenzi P, Pesce A, Nardini M, Bolognesi M, Ciaccio C, et al. (2013) Reductive nitrosylation of *Methanosarcina acetivorans* protoglobin: a comparative study. *Biochem Biophys Res Commun* 430: 1301–1305.
  44. Bateman H (1910) Solution of a system of differential equations occurring in the theory of radioactive transformations. *Proc Cambridge Phil Soc* 15: 423–427.
  45. Milani M, Ouellet Y, Ouellet H, Guertin M, Boffi A, et al. (2004) Cyanide binding to truncated hemoglobins: a crystallographic and kinetic study. *Biochemistry* 43: 5213–5221.
  46. Bolli A, Ciaccio C, Coletta M, Nardini M, Bolognesi M, et al. (2008) Ferrous *Campylobacter jejuni* truncated hemoglobin P displays an extremely high reactivity for cyanide - a comparative study. *FEBS J* 275: 633–645.
  47. Cassoly R, Gibson QH (1975) Conformation, co-operativity and ligand binding in human hemoglobin. *J Mol Biol* 91: 301–313.
  48. Moore EG, Gibson QH (1976) Cooperativity in the dissociation of nitric oxide from hemoglobin. *J Biol Chem* 251: 2788–2794.
  49. Rohlfis RJ, Olson JS, Gibson QH (1988) A comparison of the geminate recombination kinetics of several monomeric heme proteins. *J Biol Chem* 263: 1803–1813.
  50. Chiancone E, Gibson QH (1989) Ligand binding to the dimeric hemoglobin from *Scapharca inaequivalvis*, a hemoglobin with a novel mechanism for cooperativity. *J Biol Chem* 264: 21062–21065.
  51. Van Doorslaer S, Dewilde S, Kiger L, Nistor SV, Goovaerts E, et al. (2003) Nitric oxide binding properties of neuroglobin. A characterization by EPR and flash photolysis. *J Biol Chem* 278: 4919–4925.
  52. Fasano M, Antonini G, Ascenzi P (2006) O<sub>2</sub>-Mediated oxidation of hemopexin-heme(II)-NO. *Biochem Biophys Res Commun* 345: 704–712.
  53. Abbuzzetti S, Faggiano S, Spyrikis F, Bruno S, Mozzarelli A, et al. (2011) Oxygen and nitric oxide rebinding kinetics in nonsymbiotic hemoglobin AHB1 from *Arabidopsis thaliana*. *IUBMB Life* 63: 1094–1100.
  54. Nicoletti FP, Howes BD, Fittipaldi M, Fanali G, Fasano M, et al. (2008) Ibuprofen induces an allosteric conformational transition in the heme complex of human serum albumin with significant effects on heme ligation. *J Am Chem Soc* 130: 11677–11688.
  55. Ascenzi P, Cao Y, Tundo GR, Coletta M, Fanali G, et al. (2011) Ibuprofen and warfarin modulate allosterically ferrous human serum heme-albumin nitrosylation. *Biochem Biophys Res Commun* 411: 185–189.
  56. Bocedi A, De Sanctis G, Ciaccio C, Tundo GR, di Masi A, et al. (2013) Reciprocal allosteric modulation of carbon monoxide and warfarin binding to ferrous human serum heme-albumin. *PLoS One* 8: e58842.
  57. Perutz MF (1979) Regulation of oxygen affinity of hemoglobin: influence of structure of the globin on the heme iron. *Annu Rev Biochem* 48: 327–386.
  58. Bolognesi M, Bordo D, Rizzi M, Tarricone C, Ascenzi P (1997) Nonvertebrate hemoglobins: structural bases for reactivity. *Prog Biophys Mol Biol* 68: 29–68.
  59. Banci L, Bertini I, Huber JG, Spyroulias GA, Turano P (1999) Solution structure of reduced horse heart cytochrome c. *J Biol Inorg Chem* 4: 21–31.
  60. Pesce A, Dewilde S, Nardini M, Moens L, Ascenzi P, et al. (2003) Human brain neuroglobin structure reveals a distinct mode of controlling oxygen affinity. *Structure* 11: 1087–1095.
  61. de Sanctis D, Dewilde S, Pesce A, Moens L, Ascenzi P, et al. (2004) Crystal structure of cytoglobin: the fourth globin type discovered in man displays heme hexa-coordination. *J Mol Biol* 336: 917–927.
  62. Trent JT 3rd, Kundu S, Hoy JA, Hargrove MS (2004) Crystallographic analysis of *Synechocystis* cyanoglobin reveals the structural changes accompanying ligand binding in a hexacoordinate hemoglobin. *J Mol Biol* 341: 1097–1108.
  63. Vallone B, Nienhaus K, Brunori M, Nienhaus GU (2004) The structure of murine neuroglobin: novel pathways for ligand migration and binding. *Proteins* 56: 85–92.
  64. Vallone B, Nienhaus K, Matthes A, Brunori M, Nienhaus GU (2004) The structure of carbonmonoxy neuroglobin reveals a heme-sliding mechanism for control of ligand affinity. *Proc Natl Acad Sci USA* 101: 17351–17356.
  65. Hoy JA, Hargrove MS (2008) The structure and function of plant hemoglobins. *Plant Physiol Biochem* 4: 371–379.
  66. Shepherd M, Barynin V, Lu C, Bernhardt PV, Wu G, et al. (2010) The single-domain globin from the pathogenic bacterium *Campylobacter jejuni*: novel D-

- helix conformation, proximal hydrogen bonding that influences ligand binding, and peroxidase-like redox properties. *J Biol Chem* 285: 12747–12754.
67. Fanali G, di Masi A, Trezza V, Marino M, Fasano M, et al. (2012) Human serum albumin: from bench to bedside. *Mol Aspects Med* 33: 209–290.
  68. Ouellet YH, Daigle R, Lagüe P, Dantsker D, Milani M, et al. (2008) Ligand binding to truncated hemoglobin N from *Mycobacterium tuberculosis* is strongly modulated by the interplay between the distal heme pocket residues and internal water. *J Biol Chem* 283: 27270–27278.
  69. Yeh SR, Couture M, Ouellet Y, Guertin M, Rousseau DL (2000) A cooperative oxygen binding hemoglobin from *Mycobacterium tuberculosis*. Stabilization of heme ligands by a distal tyrosine residue. *J Biol Chem* 275: 1679–1684.
  70. Ouellet H, Milani M, LaBarre M, Bolognesi M, Couture M, et al. (2007) The roles of Tyr(CD1) and Trp(G8) in *Mycobacterium tuberculosis* truncated hemoglobin O in ligand binding and on the heme distal site architecture. *Biochemistry* 46: 11440–11450.
  71. Pesce A, Bolognesi M, Nardini M (2013) Protoglobin: structure and ligand-binding properties. *Adv Microb Physiol* 63: 79–96.
  72. Silkstone G, Kapetanaki SM, Husu I, Vos MH, Wilson MT (2012) Nitric oxide binding to the cardiolipin complex of ferric cytochrome C. *Biochemistry* 51: 6760–6766.
  73. Paoli M, Anderson BF, Baker HM, Morgan WT, Smith A et al. (1999) Crystal structure of hemopexin reveals a novel high-affinity heme site formed between two beta-propeller domains. *Nat Struct Biol* 6: 926–931.
  74. Herold S, Fago A, Weber RE, Dewilde S, Moens L (2004) Reactivity studies of the Fe(III) and Fe(II)NO forms of human neuroglobin reveal a potential role against oxidative stress. *J Biol Chem* 279: 22841–22847.
  75. Perutz MF (1989) Myoglobin and haemoglobin: role of distal residues in reactions with haem ligands. *Trends Biochem Sci* 14: 42–44.
  76. Harutyunyan EH, Safonova TN, Kuranova IP, Popov AN, Teplyakov AV, et al. (1996) The binding of carbon monoxide and nitric oxide to leghaemoglobin in comparison with other haemoglobins. *J Mol Biol* 264: 152–161.
  77. Brucker EA, Olson JS, Ikeda-Saito M, Phillips GN Jr (1998) Nitric oxide myoglobin: crystal structure and analysis of ligand geometry. *Proteins* 30: 352–356.
  78. Miele AE, Santanché S, Travaglini-Allocatelli C, Vallone B, Brunori M, et al. (1999) Modulation of ligand binding in engineered human hemoglobin distal pocket. *J Mol Biol* 290: 515–524.
  79. Chan NL, Kavanaugh JS, Rogers PH, Arnone A (2004) Crystallographic analysis of the interaction of nitric oxide with quaternary-T human hemoglobin. *Biochemistry* 43: 118–132.
  80. Beetstone JG, Adeosun OS, Goddard JE, Kushimo JB, Ogunlesi MM, et al. (1976) Reactivity difference between haemoglobins. Part XIX. *J Chem Soc Dalton Trans*: 1251–1278.
  81. Royer WE Jr, Hendrickson WA, Chiancone E (1989) The 2.4-Å crystal structure of *Scapharca* dimeric hemoglobin: cooperativity based on directly communicating hemes at a novel subunit interface. *J Biol Chem* 264: 21052–21061.
  82. Hargrove MS, Barry JK, Brucker EA, Berry MB, Phillips GN Jr, et al. (1997) Characterization of recombinant soybean leghemoglobin a and apolar distal histidine mutants. *J Mol Biol* 266: 1032–1042.
  83. Milani M, Pesce A, Ouellet Y, Ascenzi P, Guertin M, et al. (2001) *Mycobacterium tuberculosis* hemoglobin N displays a protein tunnel suited for O<sub>2</sub> diffusion to the heme. *EMBO J* 20: 3902–3909.
  84. Milani M, Savard PY, Ouellet H, Ascenzi P, Guertin M, et al. (2003) A TyrCD1/TrpG8 hydrogen bond network and a TyrB10/TyrCD1 covalent link shape the heme distal site of *Mycobacterium tuberculosis* hemoglobin O. *Proc Natl Acad Sci USA* 100: 5766–5771.
  85. Pawaria S, Lama A, Raje M, Dikshit KL (2008) Responses of *Mycobacterium tuberculosis* hemoglobin promoters to *in vitro* and *in vivo* growth conditions. *Appl Environ Microbiol* 74: 3512–3522.
  86. Pathania R, Navani NK, Rajmohan G, Dikshit KL (2002) *Mycobacterium tuberculosis* hemoglobin HbO associates with membranes and stimulates cellular respiration of recombinant *Escherichia coli*. *J Biol Chem* 277: 5293–5302.
  87. Iovine NM, Pursnani S, Voldman A, Wasserman G, Blaser MJ, et al. (2008) Reactive nitrogen species contribute to innate host defense against *Campylobacter jejuni*. *Infect Immun* 76: 986–993.
  88. Elvers KT, Wu G, Gilberthorpe NJ, Poole RK, Park SF (2004) Role of an inducible single-domain hemoglobin in mediating resistance to nitric oxide and nitrosative stress in *Campylobacter jejuni* and *Campylobacter coli*. *J Bacteriol* 186: 5332–5341.
  89. Avila-Ramirez C, Tinajero-Trejo M, Davidge KS, Monk CE, Kelly DJ, et al. (2013) Do globins in microaerophilic *Campylobacter jejuni* confer nitrosative stress tolerance under oxygen limitation? *Antioxid Redox Signal* 18: 424–431.
  90. Helbo S, Dewilde S, Williams DR, Berghmans H, Berenbrink M, et al. (2012) Functional differentiation of myoglobin isoforms in hypoxia-tolerant carp indicates tissue-specific protective roles. *Am J Physiol Regul Integr Comp Physiol* 302: R693–R701.
  91. Guex N, Peitsch MC (1997) SWISS-MODEL and the Swiss-PdbViewer: an environment for comparative protein modeling. *Electrophoresis* 18, 2714–2723.
